# Supplementary material for: Development of potential therapeutics for pain treatment by inducing Sigma 1 receptor antagonism – in silico approach
Source: Royal Society of Chemistry journal article supplement (doi:10.1039/d1nj00883h), 2021-01-01
Supplement: d1nj00883h1.pdf [file d1nj00883h1.pdf]

## Supplementary material

Development of potential therapeutic for the pain treatment by inducing sigma 1 receptor antagonism – In silico approach

Velimir Perić, Mladjan Golubović, Milan Lazarević, Vesna Marjanović, Tomislav Kostić,  
Miodrag Đorđević, Dragan Milić, Aleksandar M. Veselinović\*

## Table of content

|                                                      |    |
|------------------------------------------------------|----|
| Statistical validation of developed QSAR models..... | 1  |
| Table S1.....                                        | 3  |
| Table S2.....                                        | 9  |
| Figures S1-S15.....                                  | 13 |

\*Corresponding author:

Aleksandar M. Veselinović,

Faculty of Medicine, Department of Chemistry, University of Niš,

Bulevar Dr Zorana Đinđića 81, 18000 Niš, Serbia

Fax: +381 18 4238770; Phone: +381 18 4570029; E-mail: [aveselinovic@medfak.ni.ac.rs](mailto:aveselinovic@medfak.ni.ac.rs)

## Validation of Developed QSAR Models

The main goal of any QSPR modeling is to developing of a robust model capable of predicting the properties of new molecules in objective, reliable and precise manner. Most common methodology used in QSAR modeling with SMILES based optimal descriptors for the assessment of robustness and the reliability of developed QSAR model is the application of three methods: a) internal validation or cross-validation using the training set compounds, b) external validation using the test set compounds and c) data randomization or Y-scrambling.

The most common internal method of validating the model is least squares fitting. This method of validation is similar to linear regression and is the  $R^2$  (squared correlation coefficient) for the comparison between the predicted and experimental activities.

Leave-one-out (LOO) cross validation technique is used to developed models as an internal validation. LOO is based on principle that one molecule is randomly omitted from data set in each cycle and than the rest of molecules is used to model development. The process is repeated until all the compounds are eliminated once. Cross-validated coefficient  $Q^2$  demonstrates the predictive ability of the model, where higher value of  $Q^2$  means better model prediction. The cross-validated  $Q^2$  is defined as:

$$Q^2 = 1 - \frac{\sum(Y_{\text{obs}} - Y_{\text{pred}})^2}{\sum(Y_{\text{obs}} - \bar{Y}_{\text{train}})^2} \quad (1)$$

In Eq. 1,  $Y_{\text{obs}}$  is observed property of the training set compounds,  $Y_{\text{pred}}$  is LOO-predicted property of the training set compounds and  $\bar{Y}_{\text{train}}$  is mean observed property of the training set compounds. The predictive ability of model is considered as acceptable when  $Q^2$  is higher than 0.5.

Same principles and statistical methodology can be applied for external validation. The predictive ability of a model is determined by calculating  $Q^2_{\text{ext}}$  which is defined as:

$$Q^2_{\text{ext}} = 1 - \frac{\sum(Y_{\text{obs}(\text{test})} - Y_{\text{pred}(\text{test})})^2}{\sum(Y_{\text{obs}(\text{test})} - \bar{Y}_{\text{train}})^2} \quad (2)$$

In Eq. 2,  $Y_{\text{obs}(\text{test})}$  is the observed property of the test set compounds,  $Y_{\text{pred}(\text{test})}$  is the predicted property of the test set compounds and  $\bar{Y}_{\text{train}}$  is mean observed property of the training set compounds. The value  $Q^2_{\text{ext}}$  for an acceptable model should be greater than 0.5.

True predictive potential of developed QSAR models can be defined with novel statistical metric ( $R^2_m$ ). For calculating  $R^2_m$  metric an open access web application "R2m calculator" is available at <http://203.200.173.43:8080/rmsquare/>.

Y-randomization test is used for testing the robustness of the developed QSAR model. For an appropriate QSPR model, the average correlation coefficient ( $R_r$ ) of randomized models should be less than the correlation coefficient ( $R$ ) of non-randomized model. A parameter  ${}^cR^2_p$  penalizes the model  $R^2$  for a small difference between squared mean correlation coefficient ( $R_r^2$ ) of randomized models and squared correlation coefficient ( $R^2$ ) of the non-randomized model. The parameter  ${}^cR^2_p$  is defined as:

$${}^cR^2_p = R\sqrt{(R^2 - R_r^2)} \quad (3)$$

For an acceptable QSPR model, the value of  ${}^cR^2_p$  should be greater than 0.5.

The quality of prediction for one substance from a set can be estimated as the following:

$$\Delta k = k_{\text{observed}} - k_{\text{calculated}}$$

Having data on all  $\Delta k$  for the test set, one can calculate sum of negative and positive values of  $\Delta k$  similar to mean absolute error (MAE):

$${}^-MAE_{test} = \frac{1}{{}^-N} \times \sum_{k=1}{}^-N |\Delta_k|, \Delta_k < 0, {}^-N \text{ is the number of } \Delta_k < 0 \quad (4)$$

$${}^+MAE_{test} = \frac{1}{{}^+N} \times \sum_{k=1}{}^+N |\Delta_k|, \Delta_k > 0, {}^+N \text{ is the number of } \Delta_k > 0 \quad (5)$$

The index of ideality of correlation (IIC) for test set is calculated with the following formula:

$$IIC = r_{test} \times \frac{\min({}^-MAE_{test}, {}^+MAE_{test})}{\max({}^-MAE_{test}, {}^+MAE_{test})} \quad (6)$$

Table S1. The SMILES notation of the studied molecules, calculated values for the DCW, experimental data (Ac) – expr, the values of Ac calculated with the application of CORAL software – calc, the difference between expr and calc – diff for the built QSPR model

| SMILES notation | pKi(ex.)                                           | Split 1 |           |        |         | Split 2 |           |        |         | Split 3 |           |        |         |    |
|-----------------|----------------------------------------------------|---------|-----------|--------|---------|---------|-----------|--------|---------|---------|-----------|--------|---------|----|
|                 |                                                    | DCW     | pKi(cal.) | Diff   | Set     | DCW     | pKi(cal.) | Diff   | Set     | DCW     | pKi(cal.) | Diff   | Set     |    |
| 1               | <chem>c1ccc(cc1)OCc1cc(no1)OCCN1CCOCC1</chem>      | 6.4     | 28.30099  | 6.617  | -0.217  | Tr      | 15.20649  | 6.8536 | -0.4536 | Ts      | 25.09287  | 6.8661 | -0.4661 | Ts |
| 2               | <chem>c1ccc(cc1)OCc1cc(no1)OCCCN</chem>            | 5.6     | 25.20739  | 6.4906 | -0.8906 | Tr      | 12.46205  | 6.6725 | -1.0725 | Ts      | 14.73482  | 6.2666 | -0.6666 | Tr |
| 3               | <chem>c1ccc(cc1)OCc1cc(no1)OCC1CCNCC1</chem>       | 6.45    | 41.40452  | 7.1524 | -0.7024 | Tr      | 23.65808  | 7.4113 | -0.9613 | Tr      | 24.26085  | 6.818  | -0.368  | Tr |
| 4               | <chem>COc1ccc(cc1)OCc1cc(no1)OCC1CCCN1</chem>      | 6.68    | 40.63071  | 7.1207 | -0.4407 | Tr      | 18.45855  | 7.0682 | -0.3882 | Tr      | 32.97175  | 7.3222 | -0.6422 | Tr |
| 5               | <chem>c1ccc(cc1)NC(=O)c1cc(no1)OCC1CCCN1</chem>    | 6.88    | 51.6576   | 7.5712 | -0.6912 | Tr      | 22.27883  | 7.3203 | -0.4403 | Ts      | 37.59203  | 7.5897 | -0.7097 | Ts |
| 6               | <chem>CN1CCC(CC1)COc1cc(COc2ccccc2)on1</chem>      | 7.02    | 51.21291  | 7.5531 | -0.5331 | Ts      | 24.79094  | 7.486  | -0.466  | Ts      | 37.3155   | 7.5737 | -0.5537 | Tr |
| 7               | <chem>CNCCOc1cc(COc2ccccc2)on1</chem>              | 7.09    | 46.20988  | 7.3487 | -0.2587 | Tr      | 22.59616  | 7.3412 | -0.2512 | Ts      | 33.10443  | 7.3299 | -0.2399 | Tr |
| 8               | <chem>c1ccc(cc1)SCc1cc(no1)OCC1CCCN1</chem>        | 7.18    | 47.39019  | 7.3969 | -0.2169 | Tr      | 20.59761  | 7.2093 | -0.0293 | Tr      | 35.37029  | 7.4611 | -0.2811 | Tr |
| 9               | <chem>c1ccc(cc1)OCc1cc(no1)OCCN</chem>             | 7.19    | 30.87132  | 6.722  | 0.468   | Ts      | 16.46785  | 6.9368 | 0.2532  | Tr      | 23.74394  | 6.7881 | 0.4019  | Tr |
| 10              | <chem>c1ccc2cc(ccc2c1)OCc1cc(no1)OCC1CCCN1</chem>  | 7.44    | 48.57206  | 7.4452 | -0.0052 | Tr      | 21.25132  | 7.2525 | 0.1875  | Tr      | 42.62665  | 7.8811 | -0.4411 | Tr |
| 11              | <chem>c1ccc(cc1)OCc1cc(no1)OCC1CCCN1</chem>        | 7.48    | 50.83757  | 7.5377 | -0.0577 | Tr      | 25.00702  | 7.5003 | -0.0203 | Tr      | 36.11146  | 7.504  | -0.024  | Tr |
| 12              | <chem>COc1cccc(c1)OCc1cc(no1)OCC1CCCN1</chem>      | 7.5     | 36.93915  | 6.9699 | 0.5301  | Tr      | 24.81826  | 7.4878 | 0.0122  | Ts      | 34.87734  | 7.4325 | 0.0675  | Tr |
| 13              | <chem>C1CC(COc2cc(COc3ccc(cc3)Br)on2)NC1</chem>    | 7.74    | 59.74648  | 7.9017 | -0.1617 | Ts      | 30.00967  | 7.8304 | -0.0904 | Tr      | 48.73615  | 8.2348 | -0.4948 | Tr |
| 14              | <chem>CCN(C)CCOc1cc(COc2ccccc2)on1</chem>          | 7.74    | 59.49517  | 7.8914 | -0.1514 | Tr      | 33.28184  | 8.0463 | -0.3063 | Ts      | 44.84955  | 8.0098 | -0.2698 | Tr |
| 15              | <chem>C1CC(COc2cc(COc3ccc(cc3)Cl)on2)NC1</chem>    | 7.88    | 62.81394  | 8.027  | -0.147  | Ts      | 30.97606  | 7.8942 | -0.0142 | Tr      | 44.52271  | 7.9909 | -0.1109 | Tr |
| 16              | <chem>c1cc(cc(c1)OCc1cc(no1)OCC1CCCN1)C(F)F</chem> | 8.18    | 68.99327  | 8.2795 | -0.0995 | Ts      | 37.89858  | 8.3509 | -0.1709 | Tr      | 56.67289  | 8.6942 | -0.5142 | Tr |
| 17              | <chem>c1ccc(c(c1)F)OCc1cc(no1)OCC1CCCN1</chem>     | 8.22    | 74.85717  | 8.519  | -0.299  | Tr      | 35.62062  | 8.2006 | 0.0194  | Ts      | 49.35642  | 8.2707 | -0.0507 | Tr |
| 18              | <chem>C1CC(COc2cc(COc3ccc(cc3)F)on2)NC1</chem>     | 8.36    | 68.21297  | 8.2476 | 0.1124  | Ts      | 36.83296  | 8.2806 | 0.0794  | Tr      | 50.04134  | 8.3103 | 0.0497  | Ts |
| 19              | <chem>c1ccc(cc1)OCc1cc(no1)OCC1CCCN1</chem>        | 8.39    | 54.98291  | 7.7071 | 0.6829  | Tr      | 24.26632  | 7.4514 | 0.9386  | Tr      | 35.19168  | 7.4507 | 0.9393  | Tr |
| 20              | <chem>Cc1cccc(c1)OCc1cc(no1)OCC1CCCN1</chem>       | 8.4     | 66.00698  | 8.1575 | 0.2425  | Tr      | 35.23679  | 8.1753 | 0.2247  | Ts      | 40.61781  | 7.7648 | 0.6352  | Tr |
| 21              | <chem>C1CC(COc2cc(COc3ccc(cc3)C(F)F)on2)NC1</chem> | 8.43    | 61.71435  | 7.9821 | 0.4479  | Tr      | 31.82223  | 7.95   | 0.48    | Tr      | 43.39094  | 7.9254 | 0.5046  | Tr |
| 22              | <chem>CCNCCOc1cc(COc2ccccc2)on1</chem>             | 8.43    | 60.99189  | 7.9526 | 0.4774  | Tr      | 25.76774  | 7.5505 | 0.8795  | Ts      | 42.8365   | 7.8933 | 0.5367  | Tr |
| 23              | <chem>CN1CCCC1COc1cc(COc2ccccc2)on1</chem>         | 8.46    | 68.00911  | 8.2393 | 0.2207  | Ts      | 41.54333  | 8.5914 | -0.1314 | Tr      | 53.63355  | 8.5183 | -0.0583 | Ts |
| 24              | <chem>c1cc(cc(c1)OCc1cc(no1)OCC1CCCN1)Br</chem>    | 8.5     | 66.01662  | 8.1579 | 0.3421  | Ts      | 41.80493  | 8.6087 | -0.1087 | Tr      | 55.95357  | 8.6526 | -0.1526 | Tr |
| 25              | <chem>c1ccc(c(c1)Cl)OCc1cc(no1)OCC1CCCN1</chem>    | 8.57    | 72.27338  | 8.4135 | 0.1565  | Tr      | 37.85423  | 8.348  | 0.222   | Tr      | 48.62614  | 8.2284 | 0.3416  | Tr |
| 26              | <chem>c1cc(cc(c1)OCc1cc(no1)OCC1CCCN1)Cl</chem>    | 8.59    | 75.20458  | 8.5332 | 0.0568  | Tr      | 36.54064  | 8.2613 | 0.3287  | Tr      | 50.81115  | 8.3549 | 0.2351  | Ts |
| 27              | <chem>CN(CCOc1cc(COc2ccccc2)on1)C1CCCC1</chem>     | 8.75    | 74.16922  | 8.4909 | 0.2591  | Ts      | 44.6096   | 8.7938 | -0.0438 | Tr      | 54.12283  | 8.5466 | 0.2034  | Tr |
| 28              | <chem>CN(CCOc1cc(COc2cccc(c2)Cl)on1)CC1CC1</chem>  | 8.95    | 93.95541  | 9.2993 | -0.3493 | Tr      | 50.41726  | 9.177  | -0.227  | Tr      | 63.55885  | 9.0928 | -0.1428 | Tr |
| 29              | <chem>CN(CCOc1cc(COc2cccc(c2)F)on1)CC1CC1</chem>   | 9.05    | 91.10628  | 9.1829 | -0.1329 | Tr      | 49.84796  | 9.1394 | -0.0894 | Tr      | 70.12138  | 9.4727 | -0.4227 | Tr |

|    |                                               |      |          |        |         |    |          |        |         |    |          |        |         |    |
|----|-----------------------------------------------|------|----------|--------|---------|----|----------|--------|---------|----|----------|--------|---------|----|
| 30 | CN(CCOe1cc(COe2cccc2)on1)CC1CC1               | 9.1  | 80.55426 | 8.7518 | 0.3482  | Tr | 41.94827 | 8.6182 | 0.4818  | Tr | 56.94525 | 8.71   | 0.39    | Tr |
| 31 | CN(CCOe1cc(COe2cccc(e2)Cl)on1)C1CCCCC1        | 9.3  | 99.12853 | 9.5106 | -0.2106 | Tr | 56.12982 | 9.554  | -0.254  | Tr | 66.77376 | 9.2789 | 0.0211  | Ts |
| 32 | CN(CCOe1cc(COe2cccc2)on1)C1CCCCC1             | 9.3  | 76.62137 | 8.5911 | 0.7089  | Ts | 44.20149 | 8.7668 | 0.5332  | Tr | 51.75464 | 8.4095 | 0.8905  | Tr |
| 33 | CN(CCOe1cc(COe2cccc(e2)F)on1)C1CCCCC1         | 9.3  | 96.2794  | 9.3942 | -0.0942 | Ts | 55.56053 | 9.5164 | -0.2164 | Tr | 73.3363  | 9.6588 | -0.3588 | Tr |
| 34 | CN(CCOe1cc(COe2cccc2)on1)C1CCCCC1             | 9.52 | 85.72738 | 8.9631 | 0.5569  | Tr | 47.66083 | 8.9951 | 0.5249  | Tr | 60.16016 | 8.8961 | 0.6239  | Tr |
| 35 | C1CCN(CC1)CCCOe1ccc(=O)n(c2ccc(e(c2)Cl)Cl)n1  | 6.02 | 51.44737 | 7.5627 | -1.5427 | Tr | 30.24382 | 7.8458 | -1.8258 | Tr | 37.26157 | 7.5705 | -1.5505 | Tr |
| 36 | c1ccc(cc1)n1c(=O)ccc(n1)OCCCN1CCC(=O)CC1      | 6.24 | 14.53859 | 6.0548 | 0.1852  | Tr | 3.28672  | 6.067  | 0.173   | Tr | 16.42831 | 6.3646 | -0.1246 | Ts |
| 37 | CC1CC(C)CN(CCCCOe2ccc(=O)n(c3cccc3)n2)C1      | 6.66 | 47.31405 | 7.3938 | -0.7338 | Ts | 18.25787 | 7.0549 | -0.3949 | Tr | 30.27656 | 7.1662 | -0.5062 | Tr |
| 38 | CC1CCN(CCCCOe2ccc(=O)n(c3cccc3)n2)CC1         | 6.85 | 52.87183 | 7.6208 | -0.7708 | Tr | 24.61288 | 7.4743 | -0.6243 | Tr | 32.98149 | 7.3228 | -0.4728 | Tr |
| 39 | c1ccc(cc1)n1c(=O)ccc(n1)OCCCN1CCCCC1          | 6.9  | 47.13448 | 7.3865 | -0.4865 | Tr | 20.36152 | 7.1937 | -0.2937 | Tr | 37.05132 | 7.5584 | -0.6584 | Tr |
| 40 | CN(C)CCCOe1ccc(=O)n(c2cccc2)n1                | 6.97 | 32.10665 | 6.7725 | 0.1975  | Tr | 16.53403 | 6.9412 | 0.0288  | Ts | 23.52342 | 6.7753 | 0.1947  | Tr |
| 41 | CC(C)N(CCCOe1ccc(=O)n(c2cccc2)n1)C(C)C        | 7.01 | 37.19138 | 6.9802 | 0.0298  | Ts | 20.6251  | 7.2111 | -0.2011 | Ts | 34.87113 | 7.4322 | -0.4222 | Tr |
| 42 | CCN(CC)CCCOe1ccc(=O)n(c2cccc2)n1              | 7.02 | 41.42634 | 7.1533 | -0.1333 | Tr | 20.21429 | 7.184  | -0.164  | Tr | 28.21628 | 7.0469 | -0.0269 | Tr |
| 43 | CC1CCN(CCCCOe2ccc(=O)n(c3ccc4cccc4e3)n2)CC1   | 7.08 | 44.62207 | 7.2838 | -0.2038 | Tr | 26.29863 | 7.5855 | -0.5055 | Tr | 32.70405 | 7.3067 | -0.2267 | Tr |
| 44 | C1CCN(CC1)CCCOe1ccc(=O)n(c2ccc3cccc3e2)n1     | 7.13 | 29.5704  | 6.6689 | 0.4611  | Tr | 10.0529  | 6.5135 | 0.6165  | Tr | 17.44587 | 6.4235 | 0.7065  | Tr |
| 45 | Cc1ccc(cc1)n1c(=O)ccc(n1)OCCCN1CCCCC1         | 7.16 | 48.03394 | 7.4232 | -0.2632 | Ts | 24.21982 | 7.4483 | -0.2883 | Tr | 34.35136 | 7.4021 | -0.2421 | Ts |
| 46 | c1ccc(cc1)n1c(=O)ccc(n1)OCCCN1CCOCC1          | 7.18 | 24.31799 | 6.4543 | 0.7257  | Tr | 11.69503 | 6.6219 | 0.5581  | Tr | 21.00784 | 6.6297 | 0.5503  | Tr |
| 47 | Cc1ccc(cc1)n1c(=O)ccc(n1)OCCCN1CCC(C)CC1      | 7.21 | 49.05583 | 7.4649 | -0.2549 | Tr | 22.9704  | 7.3659 | -0.1559 | Ts | 26.14931 | 6.9273 | 0.2827  | Tr |
| 48 | CC1CCN(CCCOe2ccc(=O)n(c3cc(ccc3Cl)Cl)n2)CC1   | 7.22 | 46.85431 | 7.375  | -0.155  | Tr | 23.41818 | 7.3954 | -0.1754 | Ts | 37.07382 | 7.5597 | -0.3397 | Tr |
| 49 | CC1CC(C)CN(CCCOe2ccc(=O)n(c3cccc3)n2)C1       | 7.34 | 44.00345 | 7.2585 | 0.0815  | Ts | 18.35975 | 7.0617 | 0.2783  | Tr | 27.86397 | 7.0265 | 0.3135  | Ts |
| 50 | C1CCN(CC1)CCCOe1ccc(=O)n(c2cc(ccc2Cl)Cl)n1    | 7.35 | 49.16866 | 7.4696 | -0.1196 | Tr | 25.26399 | 7.5172 | -0.1672 | Tr | 35.48713 | 7.4678 | -0.1178 | Tr |
| 51 | CCN1CCN(CCCOe2ccc(=O)n(c3cccc3)n2)CC1         | 7.4  | 47.12042 | 7.3859 | 0.0141  | Tr | 24.45496 | 7.4639 | -0.0639 | Tr | 32.07019 | 7.27   | 0.13    | Tr |
| 52 | c1ccc(cc1)n1c(=O)ccc(n1)OCCCN1CCCCC1          | 7.45 | 42.03904 | 7.1783 | 0.2717  | Tr | 20.19947 | 7.183  | 0.267   | Tr | 32.40485 | 7.2894 | 0.1606  | Tr |
| 53 | CN1CCN(CCCOe2ccc(=O)n(c3cccc3)n2)CC1          | 7.5  | 44.34544 | 7.2725 | 0.2275  | Tr | 21.33993 | 7.2583 | 0.2417  | Tr | 35.31776 | 7.458  | 0.042   | Tr |
| 54 | C1CCN(CC1)CCCOe1ccc(=O)n(c2cc(cc(e2)Cl)Cl)n1  | 7.52 | 59.97102 | 7.9109 | -0.3909 | Ts | 24.68737 | 7.4792 | 0.0408  | Tr | 37.35369 | 7.5759 | -0.0559 | Ts |
| 55 | CN1CCN(CCC1)CCCOe1ccc(=O)n(c2cccc2)n1         | 7.52 | 49.79297 | 7.4951 | 0.0249  | Tr | 27.82702 | 7.6864 | -0.1664 | Ts | 41.65716 | 7.825  | -0.305  | Tr |
| 56 | C1CCN(CC1)CCCOe1ccc(=O)n(c2ccc(cc2)F)n1       | 7.7  | 61.64762 | 7.9794 | -0.2794 | Tr | 34.31421 | 8.1144 | -0.4144 | Tr | 41.95287 | 7.8421 | -0.1421 | Tr |
| 57 | C1CCN(CC1)CCCOe1ccc(=O)n(c2ccc(cc2)F)n1       | 7.77 | 61.64762 | 7.9794 | -0.2094 | Ts | 34.31421 | 8.1144 | -0.3444 | Tr | 41.95287 | 7.8421 | -0.0721 | Ts |
| 58 | CC1CCN(CCCOe2ccc(=O)n(c3ccc(e(c3)F)F)n2)CC1   | 7.82 | 67.97978 | 8.2381 | -0.4181 | Tr | 32.24338 | 7.9778 | -0.1578 | Tr | 48.37277 | 8.2137 | -0.3937 | Tr |
| 59 | CC1CCN(CCCOe2ccc(=O)n(c3ccc(e(c3)Cl)F)n2)CC1  | 8    | 60.6609  | 7.9391 | 0.0609  | Tr | 35.06751 | 8.1641 | -0.1641 | Tr | 48.27559 | 8.2081 | -0.2081 | Tr |
| 60 | C1CCN(CC1)CCCOe1ccc(=O)n(c2ccc(e(c2)Cl)F)n1   | 8    | 62.58921 | 8.0178 | -0.0178 | Tr | 35.22451 | 8.1745 | -0.1745 | Tr | 45.7699  | 8.0631 | -0.0631 | Tr |
| 61 | C1CCN(CC1)CCCOe1ccc(=O)n(c2ccc(cc2)Cl)n1      | 8.01 | 57.3479  | 7.8037 | 0.2063  | Tr | 30.77484 | 7.8809 | 0.1291  | Tr | 35.85867 | 7.4893 | 0.5207  | Tr |
| 62 | C1CCN(CC1)CCCOe1ccc(=O)n(c2ccc(e(c2)F)F)n1    | 8.1  | 65.11459 | 8.121  | -0.021  | Tr | 26.51552 | 7.5998 | 0.5002  | Tr | 43.39814 | 7.9258 | 0.1742  | Tr |
| 63 | CC1CCN(CCCOe2ccc(=O)n(c3ccc(e(c3)Cl)Cl)n2)CC1 | 8.3  | 49.51906 | 7.4839 | 0.8161  | Ts | 30.08682 | 7.8355 | 0.4645  | Tr | 39.76725 | 7.7156 | 0.5844  | Tr |
| 64 | C1CCN(CC1)CCCOe1ccc(=O)n(c2ccc(e(c2)Cl)Cl)n1  | 8.85 | 51.44737 | 7.5627 | 1.2873  | Tr | 30.24382 | 7.8458 | 1.0042  | Ts | 37.26157 | 7.5705 | 1.2795  | Tr |

|    |                                                    |      |          |        |         |    |          |        |         |    |          |        |         |    |
|----|----------------------------------------------------|------|----------|--------|---------|----|----------|--------|---------|----|----------|--------|---------|----|
| 65 | C(CCCOc1ccc2c(CCC(=O)N2Cc2ccccc2)c1)CCN1CCOCC1     | 6.07 | 38.56896 | 7.0365 | -0.9665 | Ts | 10.76942 | 6.5608 | -0.4908 | Tr | 7.30618  | 5.8365 | 0.2335  | Ts |
| 66 | c1ccc(cc1)CN1c2ccc(cc2CCC1=O)OCCCN1CCOCC1          | 6.1  | 37.59016 | 6.9965 | -0.8965 | Tr | 21.17392 | 7.2473 | -1.1473 | Tr | 22.91563 | 6.7401 | -0.6401 | Tr |
| 67 | C(CCCOc1ccc2CCC(=O)N(Cc3ccccc3)c2c1)CCN1CCOCC1     | 6.17 | 35.67219 | 6.9182 | -0.7482 | Ts | 13.31615 | 6.7288 | -0.5588 | Ts | 26.39756 | 6.9417 | -0.7717 | Tr |
| 68 | CN(C)CCCOc1ccc2CCC(=O)N(Cc3ccccc3)c2c1             | 7.08 | 38.36466 | 7.0282 | 0.0518  | Tr | 20.07301 | 7.1747 | -0.0947 | Tr | 29.62687 | 7.1286 | -0.0486 | Tr |
| 68 | c1ccc(cc1)CN1c2ccc(cc2CCC1=O)OCCCN1CCOCC1          | 6.71 | 40.72022 | 7.1244 | -0.4144 | Tr | 21.47733 | 7.2674 | -0.5574 | Ts | 29.97791 | 7.1489 | -0.4389 | Tr |
| 70 | c1ccc(cc1)CN1c2cc(ccc2CCC1=O)OCCCN1CCOCC1          | 7.05 | 49.10411 | 7.4669 | -0.4169 | Tr | 26.53673 | 7.6012 | -0.5512 | Ts | 34.28694 | 7.3984 | -0.3484 | Tr |
| 71 | c1ccc(cc1)CN1c2ccc(cc2CCC1=O)OCCCCN1CCOCC1         | 7.15 | 39.58536 | 7.078  | 0.072   | Tr | 20.834   | 7.2249 | -0.0749 | Tr | 27.15477 | 6.9855 | 0.1645  | Tr |
| 72 | c1ccc(cc1)CN1c2cc(ccc2CCC1=O)OCCCN1CCOCC1          | 7.22 | 52.41471 | 7.6022 | -0.3822 | Tr | 26.43486 | 7.5945 | -0.3745 | Tr | 36.69953 | 7.538  | -0.318  | Ts |
| 73 | c1ccc(cc1)CN1c2cc(ccc2CCC1=O)OCCCN1CCCC1           | 7.62 | 66.76678 | 8.1885 | -0.5685 | Tr | 35.28978 | 8.1788 | -0.5588 | Tr | 48.27293 | 8.208  | -0.588  | Ts |
| 74 | c1ccc(cc1)CN1c2ccc(cc2CCC1=O)OCCCN1CCOCC1          | 7.65 | 40.90076 | 7.1318 | 0.5182  | Tr | 21.07204 | 7.2406 | 0.4094  | Ts | 25.32822 | 6.8798 | 0.7702  | Ts |
| 75 | c1ccc(cc1)CN1c2cc(ccc2CCC1=O)OCCCN1CCOCC1          | 7.67 | 53.56038 | 7.649  | 0.021   | Tr | 26.88797 | 7.6244 | 0.0456  | Tr | 41.04012 | 7.7893 | -0.1193 | Tr |
| 76 | CN1CCN(CCCOc2ccc3CCC(=O)N(Cc4ccccc4)c3c2)CC1       | 8.37 | 64.7903  | 8.1078 | 0.2622  | Tr | 34.09132 | 8.0997 | 0.2703  | Tr | 47.83195 | 8.1824 | 0.1876  | Tr |
| 77 | c1ccc(cc1)CN1c2cc(ccc2CCC1=O)OCCCN1CCCC1           | 8.73 | 68.60999 | 8.2638 | 0.4662  | Tr | 35.3051  | 8.1798 | 0.5502  | Tr | 47.91783 | 8.1874 | 0.5426  | Tr |
| 78 | c1ccc(cc1)CN1c2cc(ccc2CCC1=O)OCCCN1CCOCC1          | 7.35 | 56.87098 | 7.7842 | -0.4342 | Ts | 26.78609 | 7.6177 | -0.2677 | Tr | 43.45271 | 7.9289 | -0.5789 | Tr |
| 79 | c1ccc(cc1)CN1c2cc(ccc2CCC1=O)OCCCN1CCOCC1          | 8.95 | 56.87098 | 7.7842 | 1.1658  | Tr | 26.78609 | 7.6177 | 1.3323  | Tr | 43.45271 | 7.9289 | 1.0211  | Tr |
| 80 | c1ccc(cc1)c1nc2CCCc2c(n1)OCCCN1CCC(=O)CC1          | 6.72 | 33.67383 | 6.8365 | -0.1165 | Tr | 10.27107 | 6.5279 | 0.1921  | Tr | 20.78288 | 6.6167 | 0.1033  | Tr |
| 81 | CN(C)CCCOc1c2CCCc2nc(c2ccccc2)n1                   | 6.86 | 30.26065 | 6.6971 | 0.1629  | Tr | 17.80721 | 7.0252 | -0.1652 | Tr | 24.00644 | 6.8033 | 0.0567  | Ts |
| 82 | CN(C)CCCOc1c2CCCc2nc(c2ccccc2)n1                   | 6.92 | 37.17489 | 6.9796 | -0.0596 | Tr | 19.05066 | 7.1072 | -0.1872 | Tr | 22.50112 | 6.7161 | 0.2039  | Tr |
| 83 | CCN(CC)CCCOc1c2CCCc2nc(c2ccccc2)n1                 | 7.17 | 39.58034 | 7.0778 | 0.0922  | Tr | 21.48747 | 7.268  | -0.098  | Tr | 28.6993  | 7.0749 | 0.0951  | Ts |
| 84 | CCN(CC)CCCOc1c2CCCc2nc(c2ccccc2)n1                 | 7.21 | 46.49458 | 7.3603 | -0.1503 | Tr | 22.73093 | 7.3501 | -0.1401 | Ts | 27.19398 | 6.9878 | 0.2222  | Tr |
| 85 | c1ccc(cc1)c1nc2CCCc2c(n1)OCCCN1CCCC1               | 7.23 | 47.9686  | 7.4205 | -0.1905 | Tr | 22.81284 | 7.3555 | -0.1255 | Tr | 29.38804 | 7.1148 | 0.1152  | Ts |
| 86 | c1ccc(cc1)c1nc2CCCc2c(n1)OCCCN1CCCC1               | 7.35 | 48.50702 | 7.4425 | -0.0925 | Tr | 23.45018 | 7.3975 | -0.0475 | Tr | 33.60498 | 7.3589 | -0.0089 | Tr |
| 87 | CN1CCN(CCCOc2c3CCCc3nc(c3ccccc3)n2)CC1             | 7.49 | 48.49261 | 7.4419 | 0.0481  | Tr | 23.86241 | 7.4247 | 0.0653  | Ts | 36.6207  | 7.5334 | -0.0434 | Tr |
| 88 | CC1CCN(CCCOc2c3CCCc3nc(c3ccccc3)n2)CC1             | 7.49 | 53.7084  | 7.655  | -0.165  | Tr | 27.23724 | 7.6474 | -0.1574 | Tr | 31.87184 | 7.2586 | 0.2314  | Tr |
| 89 | CC1CCN(CCCOc2c3CCCc3nc(c3ccc(cc3)C(F)(F)F)n2)CC1   | 7.53 | 54.85707 | 7.702  | -0.172  | Tr | 26.14463 | 7.5753 | -0.0453 | Tr | 37.01203 | 7.5561 | -0.0261 | Ts |
| 90 | CN1CCN(CCCOc2c3CCCc3nc(c3ccccc3)n2)CC1             | 7.56 | 41.63674 | 7.1618 | 0.3982  | Tr | 22.37035 | 7.3263 | 0.2337  | Tr | 35.53703 | 7.4707 | 0.0893  | Tr |
| 91 | Cc1ccc(cc1)c1nc2CCCc2c(n1)OCCCN1CCC(C)CC1          | 7.61 | 44.76735 | 7.2897 | 0.3203  | Tr | 22.24955 | 7.3183 | 0.2917  | Tr | 34.04121 | 7.3841 | 0.2259  | Tr |
| 92 | CC1CCN(CCCOc2c3CCCc3nc(c3ccc(cc3)Cl)n2)CC1         | 7.67 | 60.04039 | 7.9137 | -0.2437 | Ts | 27.59425 | 7.671  | -0.001  | Ts | 47.63045 | 8.1708 | -0.5008 | Tr |
| 93 | Cc1ccc(cc1)CN1c2ccc(cc2CCC1=O)OCCCN1CCCC1          | 8.77 | 74.7259  | 8.5137 | 0.2563  | Tr | 39.4434  | 8.4529 | 0.3171  | Tr | 52.44782 | 8.4496 | 0.3204  | Ts |
| 94 | Cc1ccc(cc1)CN1c2ccc(cc2CCC1=O)OCCCN1CCC(C)CC1      | 8.82 | 75.74779 | 8.5554 | 0.2646  | Tr | 38.19398 | 8.3704 | 0.4496  | Tr | 44.24577 | 7.9748 | 0.8452  | Tr |
| 95 | c1ccc2c(c1)CCN2C(=O)c1ccc(no1)OCC1CCCN1            | 7.86 | 55.44491 | 7.726  | 0.134   | Tr | 18.98655 | 7.103  | 0.757   | Tr | 27.4759  | 7.0041 | 0.8559  | Ts |
| 96 | C1CCN(CC1)CCCOc1c2ccccc2c(=O)n(c2ccc(c(c2)Cl)Cl)n1 | 6.85 | 26.93069 | 6.561  | 0.289   | Ts | 12.41439 | 6.6693 | 0.1807  | Tr | 22.25526 | 6.7019 | 0.1481  | Tr |
| 97 | c1ccc(cc1)c1nc2CCCc2c(n1)OCCCN1CCCC1               | 7.23 | 47.9686  | 7.4205 | -0.1905 | Ts | 22.81284 | 7.3555 | -0.1255 | Ts | 29.38804 | 7.1148 | 0.1152  | Tr |
| 98 | c1ccc(cc1)c1nc2CCCc2c(n1)OCCCN1CCCC1               | 6.95 | 39.80795 | 7.0871 | -0.1371 | Ts | 21.94279 | 7.2981 | -0.3481 | Tr | 32.87641 | 7.3167 | -0.3667 | Tr |
| 99 | C1CCN(CC1)CCCOc1ccc2CCC(=O)Nc2c1                   | 7.05 | 29.60188 | 6.6702 | 0.3798  | Ts | 21.02475 | 7.2375 | -0.1875 | Tr | 31.89062 | 7.2596 | -0.2096 | Tr |

|     |                                                      |      |          |        |         |    |          |        |         |    |          |        |         |    |
|-----|------------------------------------------------------|------|----------|--------|---------|----|----------|--------|---------|----|----------|--------|---------|----|
| 100 | CN1c2cc(ccc2CCC1=O)OCCCN1CCCCC1                      | 7.47 | 47.83736 | 7.4152 | 0.0548  | Tr | 26.04946 | 7.5691 | -0.0991 | Tr | 40.25629 | 7.7439 | -0.2739 | Tr |
| 101 | CC1CCN(CCCOc2ccc3CCC(=O)Nc3c2)CC1                    | 7.17 | 44.39707 | 7.2746 | -0.1046 | Ts | 23.816   | 7.4217 | -0.2517 | Tr | 30.92845 | 7.2039 | -0.0339 | Ts |
| 102 | CC1CCN(CCCOc2ccc3CCC(=O)N(C)c3c2)CC1                 | 7.39 | 53.05182 | 7.6282 | -0.2382 | Tr | 21.78971 | 7.288  | 0.102   | Tr | 27.70115 | 7.0171 | 0.3729  | Tr |
| 103 | Cc1c(C)c(=O)n(c2ccc(c(c2)Cl)Cl)nc1OCCCN1CCCCC1       | 7.18 | 49.20208 | 7.4709 | -0.2909 | Tr | 19.90313 | 7.1635 | 0.0165  | Tr | 38.20152 | 7.625  | -0.445  | Tr |
| 104 | CN1CCCC1Oc1cc(COe2ccc(c2)F)on1                       | 9.15 | 79.46693 | 8.7074 | 0.4426  | Ts | 44.84946 | 8.8096 | 0.3404  | Tr | 69.5655  | 9.4405 | -0.2905 | Tr |
| 105 | c1cc(cc(c1)OCc1cc(no1)OC1CCCN1)F                     | 8.85 | 63.25392 | 8.045  | 0.805   | Ts | 36.8953  | 8.2847 | 0.5653  | Ts | 53.41571 | 8.5056 | 0.3444  | Tr |
| 106 | c1ccc(cc1)NC(=O)OCc1cc(no1)OC1CCCN1                  | 6.52 | 32.83813 | 6.8024 | -0.2824 | Ts | 11.95983 | 6.6393 | -0.1193 | Tr | 18.65601 | 6.4935 | 0.0265  | Ts |
| 107 | CN1CCCC1Oc1cc(COe2ccc(c2)Cl)on1                      | 8.86 | 82.31606 | 8.8238 | 0.0362  | Tr | 45.41876 | 8.8472 | 0.0128  | Tr | 63.00296 | 9.0606 | -0.2006 | Ts |
| 108 | CN1CCC(CC1)Oc1cc(COe2ccc(c2)on1                      | 6.99 | 37.76831 | 7.0038 | -0.0138 | Tr | 20.11533 | 7.1775 | -0.1875 | Tr | 29.36972 | 7.1137 | -0.1237 | Tr |
| 109 | CC1CCN(CCCOc2ccc(=O)n(c3ccc(cc3Cl)Cl)n2)CC1          | 7.46 | 49.57931 | 7.4863 | -0.0263 | Tr | 23.13908 | 7.377  | 0.083   | Tr | 38.10094 | 7.6191 | -0.1591 | Tr |
| 110 | CC1CCN(CCCOc2ccc(=O)n(c3ccc(c3)n2)CC1                | 7.55 | 49.56123 | 7.4856 | 0.0644  | Tr | 24.71476 | 7.481  | 0.069   | Ts | 30.56891 | 7.1831 | 0.3669  | Tr |
| 111 | c1ccc(cc1)n1c(=O)ccc(n1)OCCCN1CCCCC1                 | 7.67 | 43.82388 | 7.2512 | 0.4188  | Tr | 20.4634  | 7.2005 | 0.4695  | Tr | 34.63873 | 7.4187 | 0.2513  | Tr |
| 112 | CC1CCN(CCCOc2ccc(=O)n(c3cc(cc(c3)Cl)Cl)n2)CC1        | 7.37 | 58.04271 | 7.8321 | -0.4621 | Tr | 24.53037 | 7.4688 | -0.0988 | Ts | 39.85937 | 7.7209 | -0.3509 | Ts |
| 113 | CC1CCN(CCCOc2ccc(=O)n(c3ccc(c3Cl)Cl)n2)CC1           | 7.26 | 35.26333 | 6.9015 | 0.3585  | Tr | 22.62707 | 7.3432 | -0.0832 | Ts | 33.31057 | 7.3418 | -0.0818 | Tr |
| 114 | CC1CCN(CCCOc2ccc(=O)n(c3ccc(cc3)Cl)n2)CC1            | 8.02 | 53.07867 | 7.6293 | 0.3907  | Tr | 27.94003 | 7.6938 | 0.3262  | Tr | 36.06246 | 7.5011 | 0.5189  | Ts |
| 115 | C1CCN(CC1)CCCOc1ccc(=O)n(c2ccc(cc2Cl)Cl)n1           | 7.6  | 51.89367 | 7.5809 | 0.0191  | Tr | 24.9849  | 7.4988 | 0.1012  | Tr | 36.51426 | 7.5273 | 0.0727  | Ts |
| 116 | C1CCN(CC1)CCCOc1ccc(=O)n(c2ccc(c2Cl)Cl)n1            | 7.32 | 35.23677 | 6.9004 | 0.4196  | Tr | 21.79507 | 7.2883 | 0.0317  | Tr | 29.422   | 7.1167 | 0.2033  | Tr |
| 117 | c1ccc(cc1)CN1c2cc(ccc2CCC1=O)OCCCN1CCOCC1            | 7.83 | 49.10411 | 7.4669 | 0.3631  | Tr | 26.53673 | 7.6012 | 0.2288  | Tr | 34.28694 | 7.3984 | 0.4316  | Tr |
| 118 | c1ccc(cc1)CCN1c2ccc(cc2CCC1=O)OCCCN1CCOCC1           | 7.39 | 40.72022 | 7.1244 | 0.2656  | Tr | 21.47733 | 7.2674 | 0.1226  | Tr | 29.97791 | 7.1489 | 0.2411  | Tr |
| 119 | CN(C)CCCOc1ccc2CCC(=O)N(Cc3ccc(c3)c2c1               | 7.08 | 38.36466 | 7.0282 | 0.0518  | Ts | 20.07301 | 7.1747 | -0.0947 | Tr | 29.62687 | 7.1286 | -0.0486 | Ts |
| 120 | CCN(CC)CCCOc1ccc2CCC(=O)N(Cc3ccc(c3)c2c1             | 7.4  | 47.68435 | 7.4089 | -0.0089 | Tr | 23.75327 | 7.4175 | -0.0175 | Tr | 34.31972 | 7.4002 | -0.0002 | Ts |
| 121 | c1ccc(cc1)CCN1c2ccc(cc2CCC1=O)OCCCN1CCOCC1           | 7.39 | 40.72022 | 7.1244 | 0.2656  | Ts | 21.47733 | 7.2674 | 0.1226  | Ts | 29.97791 | 7.1489 | 0.2411  | Tr |
| 122 | CC1CCN(CCCOc2c3CCCc3nc(c3ccc(c3)n2)CC1               | 7.59 | 46.85253 | 7.3749 | 0.2151  | Tr | 25.74517 | 7.549  | 0.041   | Tr | 30.78818 | 7.1958 | 0.3942  | Tr |
| 123 | c1ccc(cc1)CN1c2cc(ccc2CCC1=O)OCCCN1CCN(CC1)c1ccc(c1~ | 6.47 | 44.09553 | 7.2623 | -0.7923 | Tr | 19.31931 | 7.125  | -0.655  | Ts | 26.80298 | 6.9651 | -0.4951 | Tr |
| 124 | c1ccc(cc1)OCc1cc(no1)N1CCNCC1                        | 8.27 | 47.06634 | 7.3837 | 0.8863  | Tr | 20.87671 | 7.2277 | 1.0423  | Tr | 28.84991 | 7.0836 | 1.1864  | Tr |
| 125 | c1cc(ccc1Cl)OCc1cc(no1)N1CCNCC1                      | 7.44 | 55.6605  | 7.7348 | -0.2948 | Tr | 29.50906 | 7.7974 | -0.3574 | Tr | 38.47235 | 7.6406 | -0.2006 | Ts |
| 126 | CN1CCN(CC1)c1cc(COe2ccc(c2)on1                       | 7.19 | 54.50823 | 7.6877 | -0.4977 | Tr | 25.67662 | 7.5445 | -0.3545 | Tr | 39.38869 | 7.6937 | -0.5037 | Tr |
| 127 | C1CCN(CC1)CCCOc1c2CCCc2c(=O)n(c2ccc(c(c2)Cl)Cl)n1    | 6.98 | 39.69621 | 7.0826 | -0.1026 | Tr | 15.28332 | 6.8586 | 0.1214  | Tr | 30.21262 | 7.1625 | -0.1825 | Tr |
| 128 | c1ccc(cc1)c1nc2CCCc2c(n1)OCCCN1CCOCC1                | 6.92 | 36.51117 | 6.9524 | -0.0324 | Tr | 20.29482 | 7.1893 | -0.2693 | Ts | 24.91571 | 6.8559 | 0.0641  | Tr |
| 129 | c1ccc(cc1)c1nc2CCCc2c(n1)OCCCN1CCCCC1                | 7.35 | 41.65116 | 7.1624 | 0.1876  | Tr | 21.95811 | 7.2991 | 0.0509  | Ts | 32.52131 | 7.2961 | 0.0539  | Tr |
| 130 | C1CCN(CC1)CCCOc1ccc2CCC(=O)N(Cc3ccc(cc3)F)c2c1       | 8.91 | 78.44881 | 8.6658 | 0.2442  | Tr | 43.13625 | 8.6966 | 0.2134  | Tr | 54.37167 | 8.561  | 0.349   | Tr |
| 131 | CC1CCN(CCCOc2c3CCCc3nc(Cc3ccc(cc3)Cl)n2)CC1          | 7.81 | 67.61457 | 8.2231 | -0.4131 | Tr | 35.54164 | 8.1954 | -0.3854 | Tr | 50.65936 | 8.3461 | -0.5361 | Ts |
| 132 | c1ccc(cc1)c1ccc(nc2ccc(c2)n1)OCCCN1CCCCC1            | 6.01 | 35.58626 | 6.9147 | -0.9047 | Ts | 14.16289 | 6.7847 | -0.7747 | Ts | 21.82302 | 6.6769 | -0.6669 | Tr |
| 134 | Cc1cc(nc2ccc(c2)n1)OCC(CN1CCOCC1)O                   | 6.31 | 23.01288 | 6.401  | -0.091  | Tr | 7.49473  | 6.3447 | -0.0347 | Tr | 11.53387 | 6.0813 | 0.2287  | Tr |
| 135 | Cc1cc(nc2ccc(c2)n1)OCC(CN1CCOCC1)O                   | 6.33 | 23.01288 | 6.401  | -0.071  | Tr | 7.49473  | 6.3447 | -0.0147 | Tr | 11.53387 | 6.0813 | 0.2487  | Tr |

|     |                                                 |      |          |        |         |    |          |        |         |    |          |        |         |    |
|-----|-------------------------------------------------|------|----------|--------|---------|----|----------|--------|---------|----|----------|--------|---------|----|
| 136 | Cc1cc(nc(e2cccc2)n1)OCCOCCN1CCOCC1              | 6.37 | 22.95086 | 6.3985 | -0.0285 | Tr | 8.82825  | 6.4327 | -0.0627 | Tr | 15.05782 | 6.2852 | 0.0848  | Tr |
| 137 | Cc1cc(nc(e2cccc2)n1)OCCCN1C(C)(C)CCCC1(C)C      | 6.42 | 33.93284 | 6.8471 | -0.4271 | Tr | 8.42317  | 6.406  | 0.014   | Tr | 21.30306 | 6.6468 | -0.2268 | Tr |
| 138 | c1ccc(cc1)c1nc(cc(n1)OCCCN1CCCCC1)C1CC1         | 6.56 | 32.21405 | 6.7769 | -0.2169 | Tr | 18.78335 | 7.0896 | -0.5296 | Tr | 29.76497 | 7.1366 | -0.5766 | Tr |
| 140 | CC(C)c1cc(nc(e2cccc2)n1)OCCCN1CCCCC1            | 6.66 | 31.97576 | 6.7672 | -0.1072 | Tr | 17.42469 | 6.9999 | -0.3399 | Tr | 24.60282 | 6.8378 | -0.1778 | Tr |
| 141 | Cc1c(c(ncn1)OCCCN1CCCCC1)Cl                     | 6.73 | 35.88094 | 6.9267 | -0.1967 | Tr | 17.61488 | 7.0125 | -0.2825 | Tr | 31.9057  | 7.2605 | -0.5305 | Ts |
| 142 | CC(C)c1cc(nc(e2cccc2)n1)OCCCN1CCCCC1            | 6.72 | 31.97576 | 6.7672 | -0.0472 | Ts | 17.42469 | 6.9999 | -0.2799 | Ts | 24.60282 | 6.8378 | -0.1178 | Ts |
| 143 | Cc1cc(nc(e2cccc2)n1)OCCCN1CCNCC1                | 6.82 | 41.77103 | 7.1673 | -0.3473 | Ts | 25.74796 | 7.5492 | -0.7292 | Tr | 35.92979 | 7.4935 | -0.6735 | Ts |
| 144 | Cc1cc(nc(e2cccc2)n1)OCCCN1CCOCC1                | 6.94 | 43.57342 | 7.241  | -0.301  | Tr | 23.03425 | 7.3701 | -0.4301 | Tr | 31.49924 | 7.237  | -0.297  | Tr |
| 145 | Cc1c(c(nc(e2ccc3cccc3e2)n1)OCCCN1CCCCC1)Cl      | 6.99 | 44.60053 | 7.2829 | -0.2929 | Ts | 22.04843 | 7.3051 | -0.3151 | Tr | 36.11218 | 7.504  | -0.514  | Ts |
| 146 | Cc1c(c(nc(e2ccc3cccc3e2)n1)OCCCN1CCCCC1)Cl      | 7.05 | 44.60053 | 7.2829 | -0.2329 | Tr | 22.04843 | 7.3051 | -0.2551 | Tr | 36.11218 | 7.504  | -0.454  | Tr |
| 147 | Cc1cc(nc(e2cccc2)n1)OCCCN(C)C                   | 7.08 | 36.55766 | 6.9543 | 0.1257  | Tr | 19.8233  | 7.1582 | -0.0782 | Tr | 27.95322 | 7.0317 | 0.0483  | Tr |
| 148 | Cc1c(c(nc(C)n1)OCCCN1CCCCC1)Cl                  | 7.23 | 53.63494 | 7.652  | -0.422  | Tr | 23.59391 | 7.407  | -0.177  | Ts | 33.82078 | 7.3714 | -0.1414 | Tr |
| 149 | CCN(CC)CCCOc1cc(C)nc(e2cccc2)n1                 | 7.33 | 42.83889 | 7.211  | 0.119   | Tr | 22.48949 | 7.3342 | -0.0042 | Ts | 33.01927 | 7.325  | 0.005   | Tr |
| 150 | Cc1c(c(nc(C2CC2)n1)OCCCN1CCCCC1)Cl              | 7.4  | 64.07513 | 8.0785 | -0.6785 | Tr | 29.15792 | 7.7742 | -0.3742 | Tr | 43.77176 | 7.9474 | -0.5474 | Tr |
| 151 | CCCN(CCC)CCCOc1cc(C)nc(e2cccc2)n1               | 7.41 | 53.10794 | 7.6305 | -0.2205 | Tr | 24.96702 | 7.4976 | -0.0876 | Tr | 35.88256 | 7.4907 | -0.0807 | Tr |
| 152 | Cc1cc(nc(e2cccc2)n1)OCCCN1CCOCC1                | 7.44 | 43.57342 | 7.241  | 0.199   | Ts | 23.03425 | 7.3701 | 0.0699  | Tr | 31.49924 | 7.237  | 0.203   | Tr |
| 153 | CCc1cc(nc(e2cccc2)n1)OCCCN1CCCCC1               | 7.45 | 55.23023 | 7.7172 | -0.2672 | Tr | 26.76594 | 7.6163 | -0.1663 | Ts | 35.38147 | 7.4617 | -0.0117 | Tr |
| 154 | CCN1CCN(CCCOc2cc(C)nc(e3cccc3)n2)CC1            | 7.51 | 48.53296 | 7.4436 | 0.0664  | Tr | 26.73016 | 7.614  | -0.104  | Ts | 36.87318 | 7.5481 | -0.0381 | Tr |
| 155 | CC1CC(C)CN(CCCOc2cc(C)nc(e3cccc3)n2)C1          | 7.52 | 45.41599 | 7.3162 | 0.2038  | Tr | 20.63495 | 7.2118 | 0.3082  | Tr | 32.66696 | 7.3046 | 0.2154  | Ts |
| 156 | c1ccc(cc1)c1nc(cc(n1)OCCCN1CCCCC1)C(F)(F)F      | 7.56 | 48.5618  | 7.4448 | 0.1152  | Tr | 25.9726  | 7.564  | -0.004  | Ts | 35.93966 | 7.494  | 0.066   | Tr |
| 157 | c1ccc(cc1)c1nc(cc(n1)OCCCN1CCCCC1)C(F)(F)F      | 7.56 | 46.77697 | 7.3718 | 0.1882  | Tr | 25.70867 | 7.5466 | 0.0134  | Tr | 33.70578 | 7.3647 | 0.1953  | Tr |
| 158 | Cc1cc(nc(e2cccc2)n1)OCCCN1CCN(C)CC1             | 7.64 | 55.2676  | 7.7187 | -0.0787 | Ts | 25.97271 | 7.564  | 0.076   | Tr | 39.79383 | 7.7171 | -0.0771 | Tr |
| 159 | CCc1cc(nc(e2cccc2)n1)OCCCN1CCCCC1               | 7.65 | 50.22841 | 7.5129 | 0.1371  | Tr | 26.8872  | 7.6243 | 0.0257  | Tr | 40.88133 | 7.7801 | -0.1301 | Tr |
| 160 | CCc1cc(nc(e2cccc2)n1)OCCCN1CCCCC1               | 8.02 | 52.01324 | 7.5858 | 0.4342  | Tr | 27.15113 | 7.6418 | 0.3782  | Tr | 43.11521 | 7.9094 | 0.1106  | Ts |
| 161 | Cc1cc(nc(e2cccc2)n1)OCCCN1CCCN(C)CC1            | 7.73 | 50.39803 | 7.5198 | 0.2102  | Ts | 28.06137 | 7.7018 | 0.0282  | Ts | 42.5867  | 7.8788 | -0.1488 | Tr |
| 162 | CC1CCN(CCCOc2cc(C)nc(e3cccc3)n2)CC1             | 7.77 | 50.97378 | 7.5433 | 0.2267  | Tr | 26.98995 | 7.6311 | 0.1389  | Tr | 35.3719  | 7.4612 | 0.3088  | Tr |
| 163 | Cc1cc(nc(e2cccc2)n1)OCCCN1CCCCC1                | 7.89 | 48.7134  | 7.451  | 0.439   | Tr | 24.69755 | 7.4799 | 0.4101  | Tr | 39.10484 | 7.6772 | 0.2128  | Tr |
| 164 | Cc1c(C)nc(e2cccc2)nc1OCCCN1CCCCC1               | 7.94 | 68.64275 | 8.2652 | -0.3252 | Ts | 36.2185  | 8.2401 | -0.3001 | Tr | 41.1151  | 7.7936 | 0.1464  | Ts |
| 165 | Cc1c(C)nc(e2cccc2)nc1OCCCN1CCCCC1               | 8.02 | 66.85791 | 8.1922 | -0.1722 | Tr | 35.95457 | 8.2227 | -0.2027 | Tr | 38.88122 | 7.6643 | 0.3557  | Ts |
| 166 | Cc1c(c(nc(e2ccc(cc2)C(F)(F)F)n1)OCCCN1CCCCC1)Cl | 8.35 | 79.53954 | 8.7103 | -0.3603 | Tr | 42.71506 | 8.6688 | -0.3188 | Tr | 44.79429 | 8.0066 | 0.3434  | Ts |
| 167 | Cc1c(Cl)nc(e2cccc2)nc1OCCCN1CCCCC1              | 8.4  | 65.19971 | 8.1245 | 0.2755  | Ts | 33.0924  | 8.0338 | 0.3662  | Tr | 52.67955 | 8.463  | -0.063  | Tr |
| 168 | Cc1c(c(nc(e2ccc(cc2)OC)n1)OCCCN1CCCCC1)Cl       | 8.41 | 68.49221 | 8.259  | 0.151   | Ts | 31.83949 | 7.9511 | 0.4589  | Tr | 42.8105  | 7.8918 | 0.5182  | Ts |
| 169 | Cc1c(F)nc(e2cccc2)nc1OCCCN1CCCCC1               | 8.42 | 78.32879 | 8.6609 | -0.2409 | Ts | 39.6118  | 8.464  | -0.044  | Tr | 57.36733 | 8.7344 | -0.3144 | Ts |
| 170 | Cc1c(F)nc(e2cccc2)nc1OCCCN1CCCCC1               | 8.45 | 76.54396 | 8.588  | -0.138  | Tr | 39.34787 | 8.4466 | 0.0034  | Tr | 55.13345 | 8.6051 | -0.1551 | Tr |
| 171 | Cc1ccc(cc1)c1nc(C)c(c(n1)OCCCN1CCCCC1)Cl        | 8.7  | 51.71004 | 7.5734 | 1.1266  | Tr | 32.72549 | 8.0096 | 0.6904  | Ts | 47.52259 | 8.1645 | 0.5355  | Tr |



|     |                                               |      |          |        |         |    |          |        |         |    |          |        |         |    |
|-----|-----------------------------------------------|------|----------|--------|---------|----|----------|--------|---------|----|----------|--------|---------|----|
| 172 | Cc1cc(nc(c2ccccc2)n1)OCC=CCN1CCOCC1           | 7.93 | 44.76944 | 7.2898 | 0.6402  | Tr | 19.70481 | 7.1504 | 0.7796  | Tr | 31.44107 | 7.2336 | 0.6964  | Ts |
| 173 | Cc1c(c(nc(c2ccc(cc2)F)n1)OCCCN1CCCCC1)Cl      | 8.94 | 81.7431  | 8.8004 | 0.1396  | Tr | 45.53311 | 8.8547 | 0.0853  | Tr | 59.65897 | 8.867  | 0.073   | Tr |
| 174 | Cc1c(c(nc(c2ccc(cc2)Cl)n1)OCCCN1CCCCC1)Cl     | 8.97 | 77.51559 | 8.6276 | 0.3424  | Tr | 41.6684  | 8.5997 | 0.3703  | Tr | 57.54444 | 8.7446 | 0.2254  | Ts |
| 175 | Cc1c(c(nc(c2ccc(c(c2)Cl)Cl)n1)OCCCN1CCCCC1)Cl | 9.01 | 77.89832 | 8.6433 | 0.3667  | Ts | 49.58642 | 9.1222 | -0.1122 | Tr | 51.85056 | 8.415  | 0.595   | Tr |
| 176 | COc1cc(nc(c2ccccc2)n1)OCCCN1CCCCC1            | 7.71 | 50.92916 | 7.5415 | 0.1685  | Tr | 26.88761 | 7.6244 | 0.0856  | Ts | 40.17568 | 7.7392 | -0.0292 | Tr |
| 177 | CCCc1cc(nc(c2ccccc2)n1)OCCCN1CCCCC1           | 7.41 | 55.23023 | 7.7172 | -0.3072 | Tr | 26.76594 | 7.6163 | -0.2063 | Ts | 35.38147 | 7.4617 | -0.0517 | Tr |
| 178 | Cc1cc(nc(c2ccccc2)n1)OCCCN1CCCCC1             | 7.87 | 46.92857 | 7.378  | 0.492   | Tr | 24.43361 | 7.4624 | 0.4076  | Tr | 36.87096 | 7.5479 | 0.3221  | Tr |
| 179 | Cc1c(Cl)nc(c2ccccc2)nc1OCCCN1CCCCC1           | 8.63 | 65.19971 | 8.1245 | 0.5055  | Ts | 33.0924  | 8.0338 | 0.5962  | Ts | 52.67955 | 8.463  | 0.167   | Ts |
| 180 | Cc1cc(nc(c2ccccc2)n1)OCCCN1CCOCC1             | 7.02 | 43.57342 | 7.241  | -0.221  | Tr | 23.03425 | 7.3701 | -0.3501 | Ts | 31.49924 | 7.237  | -0.217  | Tr |

Table S2. The list of SAKs together with their correlation weights for the three runs of the Monte Carlo optimization

| SA <sub>k</sub> | Run 1                | Run 2    | Run 3    | SA <sub>k</sub> | Run 1                | Run 2    | Run 3    | SA <sub>k</sub> | Run 1                | Run 2    | Run 3    | SA <sub>k</sub> | Run 1                | Run 2    | Run 3    | SA <sub>k</sub> | Run 1    | Run 2    | Run 3    |
|-----------------|----------------------|----------|----------|-----------------|----------------------|----------|----------|-----------------|----------------------|----------|----------|-----------------|----------------------|----------|----------|-----------------|----------|----------|----------|
|                 | CW(SA <sub>k</sub> ) |          |          |                 |          |          |          |
| \$00011000000   | 0.1073               | 0.30494  | -0.54278 | Cl.(...3...     | 0.70109              | -1.14792 | 0.58534  | NNC-C...330.    | 0.2563               | -0.11439 | 0.06109  | PT2-Br..2...    | -0.69665             | 0.92754  | 0.9242   | VS3-C...15..    | 0.20026  | -0.38208 | 0.21235  |
| \$00011000010   | 1.94563              | -0.23574 | 2.16881  | Cl.(...F...     | 1.91652              | 2.08791  | 2.9177   | NNC-C...413.    | -0.19571             | 2.28379  | 0.04819  | PT2-Cl..2...    | 0.61795              | 0.05093  | 0.41819  | VS3-C...2...    | 0.55892  | 1.07604  | 0.78136  |
| \$00011000100   | 0.17749              | 0.25786  | 0.22025  | Cl.(...Cl.      | -0.77524             | -0.80485 | 0.27177  | NNC-F...110.    | -0.4909              | -0.896   | 0.11873  | PT2-N...1...    | -4.08834             | -2.23347 | -0.79085 | VS3-C...3...    | 0.12756  | -0.41591 | -0.24444 |
| \$00011001000   | 1.43727              | 2.69535  | -0.13111 | Cl.....         | -0.86352             | -0.79657 | 0.30549  | NNC-Br..110.    | 2.38453              | 1.45372  | 2.66148  | PT2-N...2...    | 0.3923               | 0.36417  | 1.08211  | VS3-C...4...    | -0.82147 | 1.71904  | 0.62032  |
| \$10011000000   | -0.63412             | 0.54275  | 0.1107   | Cl.2.....       | -0.63697             | -1.96139 | -1.12629 | NNC-Cl..110.    | 0.44293              | -0.02583 | 0.19551  | PT2-N...3...    | 0.34421              | 0.44568  | 0.30231  | VS3-C...5...    | -0.5201  | -0.63544 | 0.01718  |
| \$10011000100   | -0.41614             | 0.19271  | 0.72717  | Cl.3.....       | -0.57883             | -0.38126 | 0.0313   | NNC-N...110.    | 0.38875              | -1.44334 | -1.61886 | PT2-N...4...    | -0.90268             | -0.83417 | 0.40852  | VS3-C...6...    | -0.1071  | 0.30888  | 0.17848  |
| \$10011001000   | 2.75664              | 1.67965  | -0.09667 | Cmax.1.....     | 0.66789              | -0.22838 | -1.25265 | NNC-N...202.    | 0.10186              | 0.08848  | 0.33031  | PT2-N...5...    | 1.07776              | -0.56772 | 0.42728  | VS3-C...7...    | 0.1948   | 2.20444  | 0.22897  |
| \$10011001100   | 1.04387              | 0.67946  | -0.13534 | Cmax.2.....     | 1.08828              | 0.98677  | 0.25908  | NNC-N...211.    | 0.48939              | -0.17825 | 0.304    | PT2-O...2...    | -1.29799             | -0.85434 | 2.2355   | VS3-C...8...    | -0.6766  | -0.18996 | 0.42242  |
| (...C.....      | 0.6819               | 2.21789  | 0.63176  | Cmax.3.....     | -0.28501             | -0.84379 | -0.10649 | NNC-N...220.    | 0.2799               | 1.03791  | 0.32529  | PT2-O...3...    | 0.75177              | 2.16594  | 0.29931  | VS3-C...9...    | 0.23872  | 0.13902  | 2.45975  |
| (.....          | 0.451                | 1.25718  | 1.066    | Cmax.4.....     | 0.43325              | 1.72716  | 0.32052  | NNC-N...303.    | 0.16353              | 0.11242  | 0.10784  | PT2-O...4...    | -1.20012             | -0.72877 | -2.04257 | VS3-F...4...    | 0.25926  | 0.29274  | 0.48412  |
| (...C...(...    | 0.78195              | 3.24842  | 0.27474  | HALO00000000    | 1.17343              | 1.01144  | 0.81517  | NNC-N...321.    | 0.32888              | -0.12203 | 0.38843  | PT2-o...3...    | -0.33245             | -0.48995 | 0.85576  | VS3-F...5...    | 0.64776  | 1.26559  | 0.27646  |
| (...F...(...    | 0.18221              | -1.89146 | -1.68543 | HALO00100000    | 1.3756               | 1.78209  | 2.48496  | NNC-N...330.    | 0.06093              | 0.48448  | 1.06898  | PT3-C...1...    | 0.38357              | -0.91685 | 0.10139  | VS3-F...6...    | 1.73375  | 1.29613  | 0.27823  |
| (...Cl.(...     | 1.01115              | 0.92402  | 0.32836  | HALO01000000    | 0.15531              | 0.41573  | 0.43836  | NNC-O...110.    | -0.97764             | 0.14597  | -0.74347 | PT3-C...2...    | 2.23844              | 1.14666  | 1.52734  | VS3-Cl..4...    | 0.4146   | 0.79492  | 0.21895  |
| (...N...(...    | -0.99398             | -0.87749 | 1.33205  | HALO10000000    | -0.06818             | 1.81795  | 2.93292  | NNC-O...211.    | 0.46959              | 0.74778  | 1.13156  | PT3-C...3...    | -0.63505             | 0.09757  | 0.20932  | VS3-Cl..5...    | -2.34998 | -0.50944 | 0.12485  |
| (...c...(...    | 0.32137              | 0.23692  | 0.67091  | HALO11000000    | 2.3101               | 0.22545  | -0.39941 | NNC-O...220.    | 0.35237              | 0.59407  | 2.29998  | PT3-C...4...    | 0.43158              | -0.00245 | 0.24926  | VS3-Cl..6...    | 1.25938  | 0.13233  | -0.7591  |
| (...n...(...    | -0.93099             | -0.52166 | -0.86923 | N...(.....      | 2.41495              | 1.45964  | 0.77058  | NNC-o...211.    | -0.90959             | 0.52042  | 0.55421  | PT3-C...5...    | 0.1347               | -0.36836 | -0.754   | VS3-Cl..7...    | 2.35441  | 0.24805  | -0.03128 |
| +++F--B2==      | 1.00021              | 0.32756  | 2.08581  | N...(..2...     | 2.04128              | -1.40246 | -1.92678 | NNEOC...100-    | 2.47498              | 2.11217  | -0.08511 | PT3-C...6...    | 0.98188              | 0.32891  | -0.34592 | VS3-Cl..8...    | 0.00559  | 1.23073  | -1.40891 |
| +++F--Cl==      | -0.01524             | 1.76265  | -1.09064 | N...(..C...     | 0.08367              | 0.01464  | 0.43769  | NNEOC...109-    | -0.97335             | -0.54338 | -0.72518 | PT3-C...7...    | -0.35105             | 2.10197  | 1.33893  | VS3-N...10..    | -0.19055 | 2.70641  | 0.18439  |
| +++F--N==       | 0.44887              | 1.10076  | 2.68693  | N.....          | -0.53966             | -1.35173 | 0.37212  | NNEOC...209-    | 0.23709              | 0.68977  | -0.03402 | PT3-F...2...    | 0.22945              | 0.42598  | 0.38728  | VS3-N...11..    | 0.86881  | 2.56367  | 0.00916  |
| +++F--O==       | 0.10055              | 0.71971  | 2.21756  | N...1...(...    | 5.37005              | 6.73044  | 6.74084  | NNEOC...218-    | -0.60912             | -0.3571  | -0.14624 | PT3-F...3...    | 0.6371               | -0.21536 | 0.00907  | VS3-N...12..    | -0.9846  | -0.66966 | -0.19608 |
| +++CL--N===     | 0.10733              | -0.58141 | 1.93257  | N...1.....      | 0.44905              | 1.89183  | 0.02242  | NNEOC...309-    | 0.39127              | 0.08121  | 0.03539  | PT3-Br..2...    | -0.77455             | 2.01254  | 1.06576  | VS3-N...13..    | 0.7745   | 2.12142  | 1.28055  |
| +++CL--O===     | 0.33779              | 2.30958  | 0.10214  | N...1...C...    | -0.01687             | -0.7955  | 2.14965  | NNEOC...318-    | -1.0346              | -0.11282 | -1.2429  | PT3-Cl..2...    | 0.29516              | 2.01814  | 0.07601  | VS3-N...14..    | -0.76636 | -0.85501 | 0.33114  |
| +++Br--N==      | 0.81187              | 1.78506  | 2.29548  | N...C...(...    | 0.19891              | -0.99816 | 0.1004   | NNEOC...327-    | -0.75801             | 0.66106  | 0.37755  | PT3-Cl..3...    | 2.38598              | -0.88886 | -0.07637 | VS3-N...15..    | -0.60176 | -0.37631 | -0.90898 |
| +++Br--O==      | 1.41264              | 0.17755  | 0.53421  | N...C.....      | 0.19358              | 0.4896   | 0.35588  | NNEOC...409-    | 0.14894              | 0.7116   | -1.61483 | PT3-Cl..4...    | -0.2171              | -0.23387 | 0.02468  | VS3-N...2...    | 3.92513  | 2.33896  | 1.75395  |
| +++CL--B2==     | 1.06037              | -0.44626 | -0.10918 | N...C...1...    | 1.27432              | 1.70729  | 1.85216  | NNEOF...109-    | 0.35587              | 0.888    | -0.66602 | PT3-N...1...    | -0.97686             | 4.55016  | 0.00343  | VS3-N...4...    | -1.81472 | -0.12487 | -0.29991 |
| +++N--B2==      | 0.42648              | -0.13024 | -0.65364 | N...C...C...    | 0.34985              | 0.36445  | 0.00084  | NNEOBr..109-    | -0.96946             | 0.82318  | -0.30139 | PT3-N...2...    | -0.3286              | -0.71379 | 0.35648  | VS3-N...6...    | 1.91509  | 0.99404  | 1.23385  |
| +++N--O==       | 14.1909              | 10.24521 | 7.01934  | O...(.....      | -0.50021             | -0.66492 | 0.30332  | NNEOCl..109-    | -0.60713             | 0.41593  | -0.20531 | PT3-N...3...    | 2.08287              | 0.03837  | 3.21606  | VS3-N...7...    | -0.1061  | -0.092   | -0.42952 |
| +++O--B2==      | -0.66407             | 0.07978  | 0.28912  | O...(..1...     | -0.17094             | -0.40124 | 0.34796  | NNEON...109-    | -0.52312             | -0.21232 | -1.45892 | PT3-N...4...    | 0.39023              | 0.20429  | 0.18765  | VS3-N...8...    | 2.89234  | -0.0382  | -1.68242 |
| 1...(.....      | 0.35388              | -0.50581 | -0.96358 | O...(..N...     | 0.32333              | 0.24754  | -0.0056  | NNEON...209-    | 0.47943              | 0.20214  | 0.09613  | PT3-N...5...    | 0.20213              | 0.26597  | 0.05918  | VS3-N...9...    | 0.20442  | 1.93347  | 0.16603  |
| 1.....          | 0.09539              | 0.72657  | 0.35141  | O...(..O...     | 0.01767              | -1.46988 | 0.11701  | NNEON...218-    | 0.20774              | 0.08389  | 0.37433  | PT3-N...6...    | 0.45535              | 0.15756  | 0.31284  | VS3-O...10..    | 1.54352  | 0.34779  | 0.85385  |
| 1...C...(...    | 3.14465              | 0.8103   | 2.81479  | O.....          | 0.67746              | 0.33903  | 0.17313  | NNEON...318-    | 0.2158               | -0.62755 | 0.28606  | PT3-N...7...    | 0.53225              | 0.3623   | 0.59184  | VS3-O...4...    | -0.49629 | -1.18636 | 0.14245  |
| 1...c...(...    | 0.41864              | -0.2331  | 0.4783   | O...1.....      | 1.93868              | 2.28357  | 2.28625  | NNEON...327-    | 0.22077              | 0.95286  | 3.37248  | PT3-O...2...    | -0.48973             | -1.38727 | -1.58405 | VS3-O...5...    | -0.64006 | -1.11307 | -2.21159 |

|               |          |          |          |               |          |          |          |               |          |          |          |               |          |          |          |              |          |          |          |
|---------------|----------|----------|----------|---------------|----------|----------|----------|---------------|----------|----------|----------|---------------|----------|----------|----------|--------------|----------|----------|----------|
| 1...n...(...  | -0.93647 | -0.47623 | 0.16326  | O...=...(...  | 0.01415  | 0.14054  | -0.05947 | NNE00...109-  | -0.57296 | 0.36869  | -0.43646 | PT3-O...3...  | 0.38906  | 0.52801  | 0.40782  | VS3-O...6... | 0.07582  | -0.5357  | 0.0814   |
| 2...(.....    | -2.76582 | -3.73805 | -2.50383 | O...=.....    | 0.21983  | -0.93921 | 0.7654   | NNE00...218-  | 0.17156  | -0.03605 | 0.1657   | PT3-O...4...  | -1.14409 | -0.03853 | -0.80945 | VS3-O...7... | -1.25376 | -1.20514 | -1.23262 |
| 2.....        | 0.19303  | 0.23924  | -0.99092 | O...=...1...  | 1.69917  | 4.5027   | 1.39589  | NNE00...209-  | -0.35385 | -0.36261 | -0.42496 | PT3-O...5...  | 1.87533  | 2.3228   | 0.29856  | VS3-O...8... | 2.23539  | 2.40333  | 0.16009  |
| 2...Cl...(... | 0.50567  | -0.88521 | 0.03685  | O...C...(...  | -0.87141 | 1.27708  | -0.1141  | NOSP11000000  | -1.65575 | 1.95467  | -0.63232 | PT3-o...4...  | 1.14807  | 0.28959  | 0.29363  | VS3-O...9... | 2.00622  | -0.03317 | 0.20452  |
| 2...c...(...  | -0.53576 | 0.27827  | -1.51427 | O...C.....    | -0.04525 | -0.21472 | 0.09294  | S2E0C...0-..  | 0.87873  | 7.02446  | 2.22234  | PT4-C...1...  | -0.72584 | 0.30653  | -0.05397 | VS3-o...10.. | 1.73252  | -0.33614 | 0.64522  |
| 2...c...1...  | -0.3455  | 1.84045  | -1.33531 | O...C...C...  | -0.68104 | -0.56523 | -0.80358 | S2E0C...1-..  | 0.29894  | -0.02242 | 0.27387  | PT4-C...10..  | 0.29156  | 1.61576  | 0.16436  | VS3-o...9... | 2.29007  | -0.60026 | 0.76703  |
| 2...n...(...  | -0.00663 | -1.42527 | -0.4742  | O...c...1...  | 0.52599  | 0.19711  | 1.95214  | S2E0C...2-..  | 0.19936  | 0.2301   | 0.10486  | PT4-C...11..  | 1.66724  | 1.29468  | 0.87458  | Smax.0.....  | -0.33674 | 1.86891  | 0.3822   |
| 3...(.....    | -0.17364 | -1.05614 | -0.2642  | O...c...2...  | 2.05596  | 0.96917  | 2.16275  | S2E0C...3-..  | 0.38171  | -0.04408 | 0.00597  | PT4-C...12..  | 2.12892  | 1.94075  | 2.6967   | c...(.....   | 0.10015  | 0.05275  | 0.15785  |
| 3.....        | 0.5704   | -0.74982 | -0.42322 | O...c...3...  | 1.12028  | -1.2913  | 0.01352  | S2E0C...4-..  | 0.70554  | 1.45614  | 0.97402  | PT4-C...2...  | -0.37308 | 0.0567   | -0.42518 | c...(1...    | 0.1385   | -0.88654 | -0.11088 |
| 3...Cl...(... | -0.14232 | -0.69475 | -0.12783 | P2E0C...0-..  | -0.09007 | -0.78848 | 0.33928  | S2E0C...5-..  | -0.97789 | 0.11694  | 0.28513  | PT4-C...3...  | 0.74697  | -0.18444 | 0.10172  | c...(3...    | -0.34219 | 0.98527  | -0.34577 |
| 3...c...(...  | 0.11569  | -0.53056 | 0.3009   | P2E0C...1-..  | 0.30951  | -0.44416 | 0.40363  | S2E0C...6-..  | 0.40723  | 0.34468  | 0.26259  | PT4-C...4...  | -0.17678 | 0.28742  | 0.02936  | c...(=...)   | 0.30259  | -0.236   | 0.24774  |
| 3...c...2...  | -0.62491 | 1.73513  | 0.26169  | P2E0C...2-..  | -0.40749 | 0.2263   | -0.21733 | S2E0C...7-..  | -0.19102 | -0.72697 | 0.5684   | PT4-C...5...  | 0.07645  | 0.21407  | -0.77364 | c...(C...    | -1.53462 | -0.63773 | -3.30595 |
| 4.....        | 0.93107  | 0.57278  | 1.04503  | P2E0F...1-..  | 2.26716  | 0.33754  | 0.48747  | S2E0C...8-..  | -0.18658 | -0.99821 | -0.12279 | PT4-C...6...  | 0.13143  | -0.15035 | -0.95235 | c...(F...    | 2.92851  | 6.53263  | 3.54108  |
| =...(.....    | 0.06557  | -0.19936 | 0.1304   | P2E0F...2-..  | -0.61923 | -0.00017 | 0.07459  | S2E0C...9-..  | 2.58371  | 2.97483  | 2.72026  | PT4-C...7...  | 0.00181  | 1.25711  | -0.52857 | c...(O...    | 0.20318  | 0.11747  | 0.00326  |
| =.....        | 0.1046   | 0.09129  | 0.88359  | P2E0Br...1-.. | 1.29732  | -0.49592 | -0.61021 | S2E0F...3-..  | 4.47065  | 0.13802  | 1.17179  | PT4-C...8...  | 0.19957  | 0.09266  | 0.06303  | c...(c...    | 0.24058  | 0.34709  | 0.17538  |
| =...1.....    | 2.39341  | -0.64862 | 0.35581  | P2E0Cl...1-.. | 0.10277  | -0.1244  | 0.10915  | S2E0F...4-..  | -1.25011 | -0.67136 | 0.55514  | PT4-C...9...  | 0.69775  | -0.9237  | 0.02873  | c.....       | -0.31561 | -1.29663 | -0.31754 |
| =...O...(...  | -0.768   | -0.44636 | 0.07203  | P2E0N...0-..  | 0.9235   | -0.91719 | 0.06412  | S2E0Br...3-.. | 2.4701   | 1.99385  | -0.85544 | PT4-F...2...  | 2.66288  | 1.33365  | 2.50784  | c...1...(... | 0.10378  | -0.81996 | 0.2179   |
| C...(.....    | 1.09242  | 1.35655  | 0.61518  | P2E0N...1-..  | -0.9154  | 0.04331  | 2.10909  | S2E0Cl...3-.. | -0.62446 | 0.11684  | 0.36713  | PT4-F...4...  | 0.30119  | -0.96483 | -0.28384 | c...1.....   | 0.09933  | -0.08239 | -0.2347  |
| C...(1...)    | -0.04947 | 2.38687  | 0.55945  | P2E0N...2-..  | 0.10501  | 0.37142  | 0.70572  | S2E0Cl...4-.. | -0.97123 | -0.77874 | 0.45861  | PT4-F...5...  | 0.12469  | 1.7684   | -0.46854 | c...1...N... | 0.13373  | 0.36833  | 3.77769  |
| C...(2...)    | -0.88769 | 0.47906  | -0.06921 | P2E0O...0-..  | -1.0265  | -1.11885 | -0.99814 | S2E0Cl...5-.. | 1.15038  | 2.1344   | -0.01661 | PT4-Br...2... | 1.77996  | -0.80758 | 0.11138  | c...1...O... | 0.08681  | 1.5851   | -0.39465 |
| C...(=...)    | -0.84721 | 0.03554  | 0.23332  | P2E0O...1-..  | 0.14371  | -1.17249 | -0.80454 | S2E0N...0-..  | 2.59021  | -0.42517 | -0.1454  | PT4-Cl...2... | 0.14372  | -0.15478 | 0.02484  | c...1...c... | -1.21187 | -4.13117 | -2.12332 |
| C...(C...)    | -1.52657 | -3.2075  | -2.19701 | P2E0O...2-..  | 2.30186  | 2.07975  | -1.84089 | S2E0N...1-..  | -0.21382 | 0.49453  | 0.03151  | PT4-Cl...5... | 0.04308  | 0.7187   | 0.02252  | c...2...(... | 2.29286  | -0.31593 | -0.82483 |
| C.....        | 0.26666  | 0.84869  | 0.29213  | P2E0o...1-..  | 0.17449  | 1.9865   | 1.94672  | S2E0N...2-..  | -2.27648 | 0.09078  | 0.5666   | PT4-Cl...8... | -0.03023 | -0.88537 | -0.11198 | c...2.....   | -0.09964 | 0.42379  | 1.31321  |
| C...1...(...  | -1.45088 | -1.16519 | -2.1028  | P3E0C...0-..  | 2.17896  | 0.15965  | 2.06156  | S2E0N...3-..  | 0.54849  | 0.38956  | 0.85015  | PT4-N...1...  | -0.49223 | 0.1153   | 1.11392  | c...2...C... | 1.80296  | 5.37448  | 2.49031  |
| C...1.....    | 0.17617  | 0.79176  | 0.00964  | P3E0C...1-..  | 0.11746  | -0.59855 | 0.49098  | S2E0N...4-..  | 3.97108  | 4.27352  | 4.91281  | PT4-N...10..  | -0.1109  | 0.55481  | 0.11479  | c...2...Cl.. | 2.19819  | -0.82381 | -1.15038 |
| C...1...=...  | 1.85349  | 2.03792  | 0.97793  | P3E0C...2-..  | 2.01776  | 0.09511  | 0.19388  | S2E0N...5-..  | -2.62808 | -4.65186 | -4.23834 | PT4-N...13..  | -0.73978 | -0.98603 | -0.75282 | c...2...c... | -0.94015 | -0.52699 | 0.52403  |
| C...1...C...  | 2.18467  | 0.50977  | 1.48702  | P3E0C...3-..  | -0.91359 | -0.25902 | -0.81734 | S2E0N...6-..  | 4.48676  | 1.82165  | 6.58066  | PT4-N...15..  | 2.34901  | 2.01732  | 0.80292  | c...3...(... | -0.15685 | -0.2064  | -0.38598 |
| C...2.....    | -0.46199 | -0.06036 | -0.31106 | P3E0C...4-..  | 0.04688  | 0.58228  | 0.01393  | S2E0N...7-..  | 3.53793  | 3.41495  | 2.92003  | PT4-N...2...  | -0.93989 | 0.22089  | -0.04032 | c...3.....   | 0.01917  | -0.0908  | 0.05011  |
| C...3.....    | 0.5496   | 1.13955  | 1.46441  | P3E0F...1-..  | -0.70294 | 0.03158  | 0.39815  | S2E0N...8-..  | 0.44268  | 0.00852  | -0.27779 | PT4-N...3...  | 1.3144   | 2.38033  | 0.09817  | c...3...C... | 1.92975  | -0.45132 | 0.6772   |
| C...C...(...  | -0.29574 | -0.6978  | -1.08828 | P3E0F...2-..  | 2.09884  | 1.92296  | 2.42763  | S2E0N...9-..  | 0.21951  | -0.77169 | 0.51762  | PT4-N...4...  | -7.47255 | -2.9966  | -7.5769  | c...3...Cl.. | -0.2617  | -1.73138 | 1.02905  |
| C...C.....    | 0.44764  | 0.50874  | 0.12547  | P3E0Br...1-.. | 1.1056   | -0.13031 | -0.1232  | S2E0O...2-..  | 0.73729  | -0.79402 | -1.36021 | PT4-N...5...  | -4.53678 | -1.45329 | -2.49203 | c...3...c... | -1.42482 | 0.14031  | -0.88361 |
| C...C...1...  | 1.00424  | 2.32387  | 0.54632  | P3E0Cl...1-.. | 0.55549  | 0.51391  | 0.02251  | S2E0O...3-..  | 0.25413  | -0.63205 | -0.62387 | PT4-N...6...  | 0.32427  | -0.23566 | -0.10655 | c...4.....   | 0.25633  | 0.41191  | 0.20567  |
| C...C...2...  | 1.53627  | -0.37921 | 2.48525  | P3E0Cl...2-.. | -0.38194 | 0.45583  | 0.94208  | S2E0O...4-..  | 1.31464  | -0.27123 | 0.43963  | PT4-N...7...  | 0.21169  | 0.25382  | 0.42618  | c...4...c... | -0.11338 | 0.2909   | 2.34021  |
| C...C...3...  | -0.20722 | 2.07065  | 1.94657  | P3E0Cl...3-.. | 0.14754  | 2.02608  | 0.73353  | S2E0O...5-..  | 0.80028  | -0.49019 | -0.7188  | PT4-N...9...  | 2.39141  | 0.43387  | 2.63593  | c...C...(... | 0.09083  | -1.50789 | -0.45357 |
| C...C...C...  | 0.11947  | 1.10397  | 0.41237  | P3E0N...0-..  | 1.31299  | -0.69967 | 0.19944  | S2E0O...6-..  | -0.00028 | 0.26985  | 1.68542  | PT4-O...2...  | 0.23344  | -1.19473 | -1.58617 | c...C.....   | 0.29788  | 1.09046  | 0.40445  |

|              |          |          |          |              |          |          |          |              |          |          |          |              |          |          |          |               |          |          |          |
|--------------|----------|----------|----------|--------------|----------|----------|----------|--------------|----------|----------|----------|--------------|----------|----------|----------|---------------|----------|----------|----------|
| C...N...C... | 0.02367  | 1.10666  | -0.45455 | P3E0N...1-.. | 0.22356  | -0.54485 | -1.35633 | S2E0o...5-.. | 1.16793  | 0.6017   | 0.23398  | PT4-O...3... | -0.4158  | 0.62629  | -0.96576 | c...C...C...  | 3.0079   | 0.61434  | 2.36904  |
| C...N...1... | -0.67901 | -2.08897 | -1.25897 | P3E0N...2-.. | -0.24456 | 2.44172  | -0.05462 | S3E0C...0-.. | 2.9645   | 2.19408  | -0.42864 | PT4-O...4... | -4.28128 | -0.74963 | -1.7804  | c...C...O...  | -0.40319 | 0.15387  | 0.44453  |
| C...N...C... | 1.31018  | 0.48506  | 0.07441  | P3E0N...3-.. | 0.38737  | 0.70559  | -0.13455 | S3E0C...1-.. | 2.56657  | 2.41996  | -0.15634 | PT4-O...5... | 0.58844  | -1.17737 | 0.1897   | c...O.....    | 0.24348  | -0.30822 | 1.97537  |
| C...O...C... | -0.48505 | 0.1494   | -0.25006 | P3E0N...4-.. | 0.89744  | 0.07985  | -0.57319 | S3E0C...10-  | -0.63705 | -0.9161  | 0.18484  | PT4-O...6... | -1.18413 | -0.52861 | 0.26539  | c...O...C...  | 0.18867  | 1.28445  | 0.09585  |
| C...O...1... | 0.16879  | 2.17313  | 0.06069  | P3E0N...5-.. | -0.91114 | -0.83313 | 0.44355  | S3E0C...11-  | -0.26482 | -0.10524 | -0.47173 | PT4-O...8... | -0.22291 | 4.50332  | 1.27249  | c...c...(...  | 0.42018  | 0.29226  | 0.42836  |
| C...O...C... | -0.31507 | 0.34591  | -0.59832 | P3E0O...0-.. | -0.55565 | 0.54392  | -0.90811 | S3E0C...12-  | 8.92992  | 0.84939  | 8.87814  | PT4-O...9... | -0.18395 | 2.64485  | 0.65151  | c...c.....    | -0.18681 | 0.03138  | 0.34329  |
| C...c...1... | 0.44542  | 2.24423  | 2.44561  | P3E0O...1-.. | -0.53967 | -0.55263 | 0.12909  | S3E0C...2-.. | 0.44947  | 2.03674  | -0.39133 | PT4-o...6... | 0.33417  | 0.07771  | 0.0544   | c...c...1...  | -0.64285 | 0.36508  | 0.23824  |
| C...c...2... | -2.02005 | -0.21928 | 0.03531  | P3E0O...2-.. | 2.07347  | 0.24679  | -0.77532 | S3E0C...3-.. | -0.10304 | -0.58307 | -0.34667 | Nmax.1.....  | -0.05113 | -0.21042 | 0.16825  | c...c...2...  | 2.47854  | 1.40718  | -0.14395 |
| C...c...3... | -0.92707 | 0.34343  | 0.02495  | P3E0O...3-.. | 2.73164  | 2.77076  | 4.02297  | S3E0C...4-.. | 0.0135   | 0.44584  | -0.04801 | Nmax.2.....  | 0.68634  | 0.89648  | -0.09541 | c...c...3...  | -0.39744 | -0.66343 | -0.63067 |
| C3.....0...  | -1.34151 | 0.27199  | -0.18468 | P3E0o...2-.. | -0.3462  | -0.27684 | 0.02172  | S3E0C...5-.. | 0.14319  | 0.31007  | 0.06846  | Nmax.3.....  | -2.42179 | -1.33798 | -2.52464 | c...c...4...  | 2.09853  | 1.3423   | 0.6005   |
| C3.....1...  | 0.30735  | 1.90729  | 0.61636  | P4E0C...0-.. | -1.04114 | -1.33946 | -1.2062  | S3E0C...6-.. | 0.68033  | 0.31309  | 0.02608  | Omax.1.....  | 0.11756  | -0.8632  | 0.88518  | c...c...c...  | -1.11725 | -0.13544 | -0.70127 |
| C4.....0...  | -1.42488 | -1.45314 | 0.17164  | P4E0C...1-.. | 0.13875  | 0.45181  | -0.59683 | S3E0C...7-.. | 0.45595  | 0.34358  | 0.35231  | Omax.2.....  | 0.16055  | 0.10095  | 2.00356  | c...n...(...  | 0.43542  | 0.42971  | 0.34424  |
| C5.....0...  | 0.11301  | -0.95606 | 0.10636  | P4E0C...10-  | -1.2479  | -1.21379 | -0.16743 | S3E0C...8-.. | 0.17486  | 0.10772  | 0.29205  | Omax.3.....  | -3.53518 | -5.22849 | -2.90334 | c...n...1...  | 1.6184   | -0.57376 | -0.69382 |
| C5...H.1...  | 3.14797  | -4.39605 | 1.61875  | P4E0C...2-.. | 0.11106  | 2.30925  | -0.34321 | S3E0C...9-.. | 0.25054  | -0.62984 | -0.8077  | VS2-C...10.. | 0.75138  | -0.49175 | 0.14474  | c...n...2...  | -0.92739 | -0.90564 | 0.27383  |
| C5...A.1...  | -0.42285 | 2.1922   | 1.34049  | P4E0C...3-.. | 0.01414  | 0.3645   | 0.2206   | S3E0F...3-.. | 0.96001  | -0.53141 | 0.13989  | VS2-C...11.. | -5.1177  | -3.22774 | -6.27332 | c...n...3...  | 2.12904  | 1.64641  | 2.05622  |
| C5...AH.1... | 2.01177  | 2.43834  | 0.41772  | P4E0C...4-.. | 0.13474  | 0.22343  | 0.08773  | S3E0F...4-.. | 0.55734  | -0.06788 | 2.43515  | VS2-C...12.. | 3.0947   | 3.53155  | 2.13873  | n...(...      | -0.15341 | -0.74164 | 0.04899  |
| C5...AH.2... | 2.77535  | 2.26353  | 0.86983  | P4E0C...5-.. | 0.30152  | 0.26413  | 0.2771   | S3E0F...5-.. | 2.05577  | -0.78369 | -1.1622  | VS2-C...2... | 2.31487  | -0.96231 | 0.12949  | n...(...1...  | 0.91411  | 0.92534  | -0.01294 |
| C6...A.1...  | 0.50934  | 1.44709  | 2.19197  | P4E0C...6-.. | 2.41072  | 0.35853  | 0.01766  | S3E0Cl.3-..  | 1.04857  | 0.29992  | -0.12516 | VS2-C...3... | -3.94602 | -0.12807 | -0.90627 | n...(...2...  | -2.18641 | -0.03803 | 0.93805  |
| C6...A.2...  | 3.13068  | 2.16639  | 8.60524  | P4E0C...7-.. | 0.34459  | 0.5068   | 0.16144  | S3E0Cl.4-..  | 0.9325   | -0.17766 | -1.45631 | VS2-C...4... | -0.12206 | 0.4615   | 0.19971  | n...(...3...  | -0.1015  | 1.42462  | 0.38588  |
| C6...AH.2... | -0.03571 | -0.87755 | -0.29967 | P4E0C...8-.. | 0.19455  | 0.58633  | 0.59319  | S3E0Cl.5-..  | -0.59139 | 1.92266  | 0.98029  | VS2-C...5... | -0.09353 | 0.49569  | -0.92606 | n...(...C...  | 0.13026  | -0.30508 | 0.99034  |
| C6...AH.3... | 0.2918   | -0.68626 | 1.03402  | P4E0F...1-.. | 0.44357  | 2.38932  | -0.92562 | S3E0Cl.6-..  | 0.10454  | 1.09081  | 1.5175   | VS2-C...6... | 0.95496  | 0.45912  | 0.72624  | n...(...F...  | -0.18039 | 1.91116  | 2.31783  |
| C6...AH.4... | 1.70042  | 0.70334  | -0.22127 | P4E0F...3-.. | -0.2604  | -0.59934 | 0.64122  | S3E0Cl.7-..  | -0.40561 | 0.21557  | -2.68884 | VS2-C...7... | 0.26281  | 0.89135  | 0.13496  | n...(...Cl... | 1.36147  | -0.44425 | 2.02243  |
| C7.....0...  | 0.28956  | 2.33074  | 0.28315  | P4E0F...4-.. | 0.38356  | -0.9027  | -0.2331  | S3E0N...0-.. | 0.76144  | 2.11077  | 2.49914  | VS2-C...8... | -0.8845  | -1.13503 | -0.40616 | n...(...O...  | 0.22174  | -0.55394 | -0.56759 |
| BOND00000000 | 2.61433  | -0.24676 | 1.29137  | P4E0Br.1-..  | -2.05323 | 0.67106  | -0.0258  | S3E0N...1-.. | -0.48055 | -8.12224 | -0.90195 | VS2-C...9... | 0.48867  | 0.34572  | 0.38481  | n...(...c...  | -0.75127 | 0.62693  | -0.82795 |
| BOND10000000 | 0.45948  | -0.52228 | 0.36545  | P4E0Cl.1-..  | -0.00555 | 0.21121  | 0.39167  | S3E0N...10-  | -0.46694 | -1.46052 | -1.21372 | VS2-F...4... | 0.65637  | 1.6251   | 0.17003  | n.....        | -1.71919 | -1.15977 | -0.1552  |
| F...(...     | 0.37346  | -0.60594 | 0.17382  | P4E0Cl.4-..  | 0.28722  | 0.30904  | -0.09372 | S3E0N...11-  | 0.28986  | -0.03391 | -0.09242 | VS2-F...5... | 0.14833  | -0.56044 | 1.00072  | n...1...(...  | 0.30131  | 0.04869  | 0.29076  |
| F...(...     | -0.63114 | 0.21399  | -1.20183 | P4E0Cl.7-..  | 0.06424  | 0.32842  | 0.22975  | S3E0N...12-  | -0.0474  | 1.01519  | 0.24165  | VS2-Br.4...  | 2.09644  | 3.02597  | -0.14256 | n...1.....    | 0.25361  | 0.02151  | 0.05105  |
| F...(...1... | 3.36786  | 2.31051  | 1.82582  | P4E0N...0-.. | 0.07878  | 0.29268  | 0.12426  | S3E0N...13-  | -0.67758 | -0.76496 | 0.5761   | VS2-Cl.4...  | 1.36689  | 2.3002   | 0.3227   | n...1...c...  | 2.1203   | -0.34195 | 0.3123   |
| F...(...2... | -0.56419 | 1.92616  | 1.9927   | P4E0N...1-.. | 2.45704  | -0.84252 | 2.0493   | S3E0N...3-.. | 0.6165   | 0.00793  | -0.64892 | VS2-Cl.5...  | 0.19597  | 0.35979  | 0.22337  | n...2...(...  | -0.53643 | -0.8918  | 0.47372  |
| F...(...3... | -2.42989 | 1.6804   | 3.5726   | P4E0N...11-  | -1.40425 | -0.87393 | -0.638   | S3E0N...4-.. | -0.84847 | -0.67251 | -1.09214 | VS2-Cl.6...  | -0.84897 | -0.22492 | 0.07799  | n...2.....    | 0.85285  | -1.40108 | 0.0066   |
| F...(...C... | -1.23893 | -0.59105 | 0.62027  | P4E0N...13-  | 1.17297  | 0.14823  | 1.19949  | S3E0N...5-.. | -3.71858 | -1.81413 | -1.32167 | VS2-N...10.. | -0.34718 | 0.72686  | -0.86385 | n...2...c...  | 0.11717  | 0.89027  | -0.60847 |
| F...(...F... | 1.55683  | 3.82385  | 1.27211  | P4E0N...2-.. | 5.51567  | 1.00358  | 3.46113  | S3E0N...6-.. | 1.93414  | 2.26832  | 2.26117  | VS2-N...11.. | -0.60743 | -0.76964 | -1.89009 | n...3.....    | -1.06675 | 0.39945  | -0.17224 |
| F.....       | -0.25642 | 0.40271  | -0.02977 | P4E0N...3-.. | -3.15323 | -3.94294 | -1.23125 | S3E0N...7-.. | 0.13702  | 0.26118  | -0.91587 | VS2-N...2... | -2.38137 | -2.68547 | -2.32919 | n...3...c...  | -0.50479 | -2.743   | 0.11153  |
| EC0-C...1... | 1.36529  | 0.63532  | -0.71085 | P4E0N...4-.. | 0.64645  | 0.29485  | -0.77612 | S3E0N...8-.. | -0.17321 | 2.08017  | 0.2511   | VS2-N...3... | 0.37537  | 1.09706  | 2.22914  | n...c...(...  | -0.77907 | 0.34709  | 0.10819  |
| EC0-C...2... | -0.59099 | 0.32309  | -0.69295 | P4E0N...5-.. | 0.25437  | -0.45967 | -0.73298 | S3E0N...9-.. | 0.2891   | 0.10828  | 0.20508  | VS2-N...4... | -1.43371 | -2.57522 | -0.25179 | n...c.....    | 0.34427  | 0.028    | -0.84239 |

|               |          |          |          |              |          |          |          |              |          |          |          |              |          |          |          |               |          |          |          |
|---------------|----------|----------|----------|--------------|----------|----------|----------|--------------|----------|----------|----------|--------------|----------|----------|----------|---------------|----------|----------|----------|
| EC0-C...3...  | 0.44363  | -0.94802 | 0.02841  | P4E0N...7-.. | -0.32941 | 0.30537  | 0.20456  | S3E0O...3-.. | -3.57489 | -1.73856 | -2.63004 | VS2-N...5... | 2.25265  | 1.60792  | 0.74477  | n...c...1...  | 0.36382  | 1.96704  | 0.07398  |
| EC0-C...4...  | -2.84645 | -3.52218 | -4.85621 | P4E0N...8-.. | -0.23901 | -0.01088 | 0.45676  | S3E0O...4-.. | 3.6375   | 3.40626  | 2.58661  | VS2-N...6... | 1.89395  | 0.64373  | 0.35143  | n...c...2...  | 0.22884  | -0.53396 | 0.29612  |
| EC0-F...1...  | 1.88975  | -0.67049 | 0.79813  | P4E0O...0-.. | -0.72253 | 0.15051  | -1.09229 | S3E0O...5-.. | 0.80665  | 0.61133  | -0.21338 | VS2-N...7... | -1.49594 | -2.54936 | -0.99321 | n...o...(...  | 0.23062  | 2.17714  | -0.35412 |
| EC0-Br...1... | 4.85701  | -0.76633 | -0.25409 | P4E0O...1-.. | 0.20479  | -0.91822 | -0.44337 | S3E0O...6-.. | 0.31675  | 0.42987  | -0.40945 | VS2-N...8... | 4.04346  | 1.53327  | -0.4605  | n...o...1...  | 0.44218  | 0.34891  | -0.154   |
| EC0-Cl...1... | 2.28233  | 2.28898  | 0.30913  | P4E0O...2-.. | -3.47871 | -2.73523 | -3.94233 | S3E0O...7-.. | 1.95468  | 2.07466  | 0.44614  | VS2-N...9... | 0.20129  | 0.21981  | 0.13947  | o...(.....    | 2.31636  | 1.60588  | -0.05444 |
| EC0-N...1...  | -1.11831 | -0.71682 | -1.7126  | P4E0O...4-.. | -0.77744 | 1.55049  | -1.11294 | S3E0O...8-.. | -0.91091 | 2.33479  | 0.41136  | VS2-O...4... | -2.0011  | -3.38297 | -0.46263 | o...(...2...  | 0.34666  | 0.41474  | 2.46063  |
| EC0-N...2...  | -0.31655 | 2.34999  | 0.02513  | P4E0O...7-.. | 0.22855  | 2.31026  | -0.63354 | S3E0O...9-.. | -0.82849 | -1.79604 | -0.42181 | VS2-O...5... | -0.28746 | -1.66268 | 0.84813  | o...(...F...  | 0.81514  | 0.44325  | 0.06351  |
| EC0-N...3...  | 0.30352  | 0.49394  | 0.05686  | P4E0o...4-.. | 2.06573  | 0.18558  | 1.05362  | S3E0o...7-.. | 0.02463  | 0.33814  | 2.10003  | VS2-O...6... | -0.87637 | -0.99916 | 0.12417  | o...(...Cl... | -0.12286 | 0.9133   | 1.09011  |
| EC0-O...1...  | -0.78822 | -0.6673  | -0.9418  | NNC-C...101. | 0.11339  | 0.37319  | 1.05365  | S3E0o...8-.. | -0.34056 | -0.53838 | 0.17812  | VS2-O...7... | -1.20212 | -0.77395 | 0.46408  | o.....        | -0.37712 | 0.37427  | -0.21875 |
| EC0-O...2...  | 0.394    | -0.57243 | -0.63992 | NNC-C...110. | 0.48951  | 0.33972  | 0.32992  | PT2-C...1... | -0.32632 | 1.32811  | 1.17307  | VS2-O...8... | 1.39421  | 0.74258  | -1.31927 | o...1...(...  | 0.01789  | -0.39389 | 0.56597  |
| EC0-o...2...  | 0.472    | 0.20462  | -0.01912 | NNC-C...202. | -0.17631 | -1.70867 | -1.50167 | PT2-C...2... | 0.0512   | 0.43351  | 0.37673  | VS2-o...7... | 0.05538  | 1.12612  | 0.35851  | o...1.....    | 0.23644  | -0.80073 | -0.36603 |
| Br...(.....   | -0.57195 | -0.03614 | 0.44963  | NNC-C...211. | -0.96548 | -0.17938 | -0.84007 | PT2-C...3... | 0.09868  | 0.25393  | 0.13102  | VS3-C...10.  | 0.01945  | -0.74064 | -0.12108 | o...n...(...  | 0.42093  | 0.7053   | 0.18398  |
| Br.....       | 2.29067  | 0.20406  | 1.06347  | NNC-C...220. | -0.05685 | 0.07171  | 0.23139  | PT2-C...4... | 0.20403  | -0.55072 | 0.49361  | VS3-C...11.  | 0.0859   | -0.00809 | 0.40133  | o...n.....    | 0.07576  | 1.08643  | -0.53852 |
| Cl...(.....   | 0.12255  | -0.52382 | 0.27748  | NNC-C...303. | -0.84083 | -0.57118 | 0.43963  | PT2-C...5... | 3.72097  | 2.35433  | 1.87727  | VS3-C...12.. | 0.15472  | 0.48983  | 0.44631  | o...n...1...  | -0.15187 | 1.77072  | 0.48232  |
| Cl...(...1... | 0.4202   | -0.51959 | 2.32791  | NNC-C...312. | 0.64318  | -0.2417  | -0.61019 | PT2-F...2... | 0.21277  | 0.37043  | 0.90618  | VS3-C...13.. | -0.59742 | 1.01497  | 0.1602   | o...n...2...  | -2.60318 | -2.09995 | 2.35885  |
| Cl...(...2... | 0.67631  | 1.78638  | 1.47438  | NNC-C...321. | -0.57378 | 1.55696  | 1.5637   | PT2-F...3... | 0.47427  | -0.94258 | 0.01426  | VS3-C...14.. | 0.13508  | -0.00858 | -0.9751  |               |          |          |          |

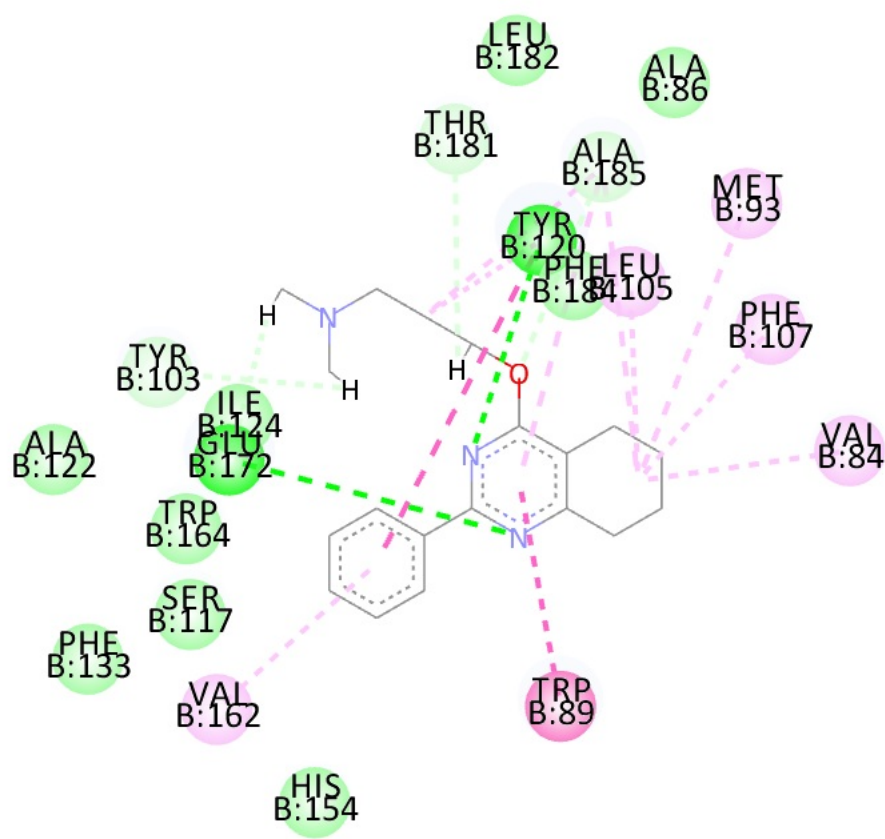

**Interactions**

- |                                                                |                                                       |
|----------------------------------------------------------------|-------------------------------------------------------|
| <span style="color: green;">■</span> van der Waals             | <span style="color: magenta;">■</span> Pi-Pi T-shaped |
| <span style="color: red;">■</span> Conventional Hydrogen Bond  | <span style="color: lightpink;">■</span> Alkyl        |
| <span style="color: lightgreen;">■</span> Carbon Hydrogen Bond | <span style="color: lightpurple;">■</span> Pi-Alkyl   |
| <span style="color: pink;">■</span> Pi-Pi Stacked              |                                                       |

Figure S1. Two-dimensional representation of the interaction between molecule A and amino acids inside sigma 1 receptor binding pocket.

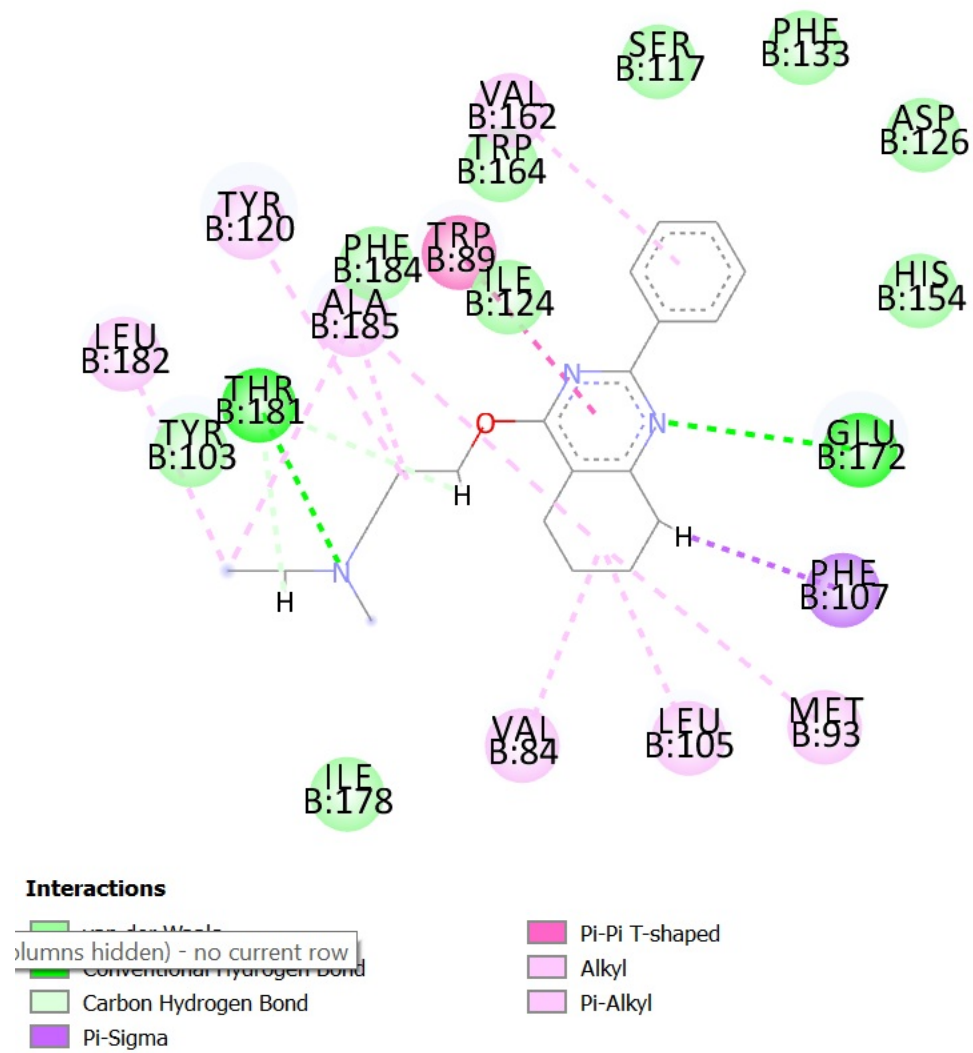

Figure S2. Two-dimensional representation of the interaction between molecule A1 and amino acids inside sigma 1 receptor binding pocket.

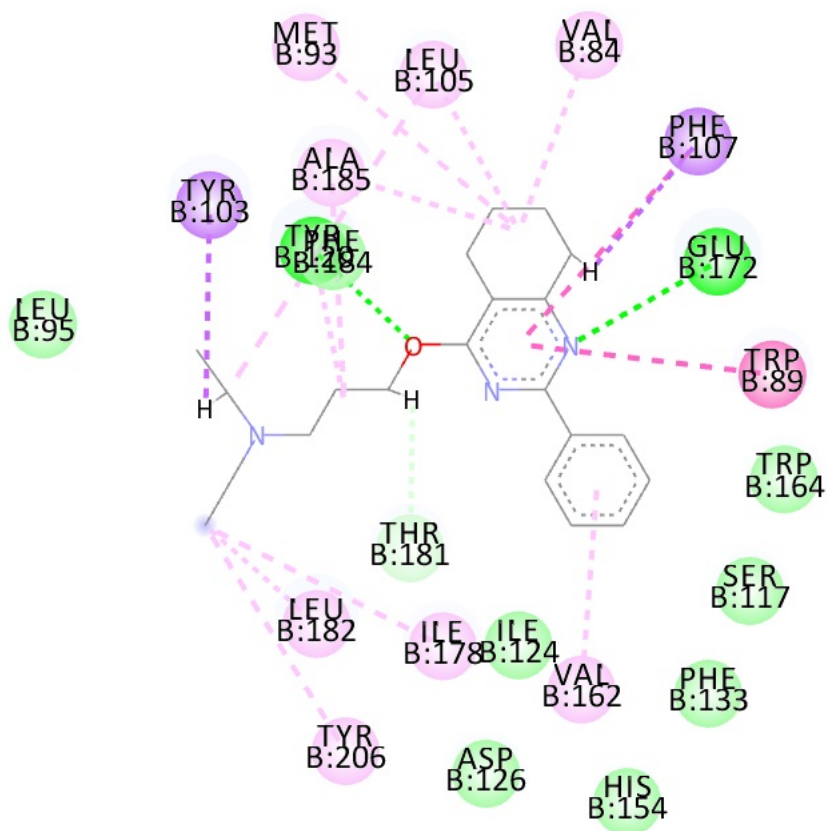

**Interactions**

- |                                                                 |                                                       |
|-----------------------------------------------------------------|-------------------------------------------------------|
| <span style="color: lightgreen;">■</span> van der Waals         | <span style="color: magenta;">■</span> Pi-Pi T-shaped |
| <span style="color: green;">■</span> Conventional Hydrogen Bond | <span style="color: pink;">■</span> Alkyl             |
| <span style="color: lightpurple;">■</span> Carbon Hydrogen Bond | <span style="color: purple;">■</span> Pi-Alkyl        |
| <span style="color: purple;">■</span> Pi-Sigma                  |                                                       |

Figure S3. Two-dimensional representation of the interaction between molecule A2 and amino acids inside sigma 1 receptor binding pocket.



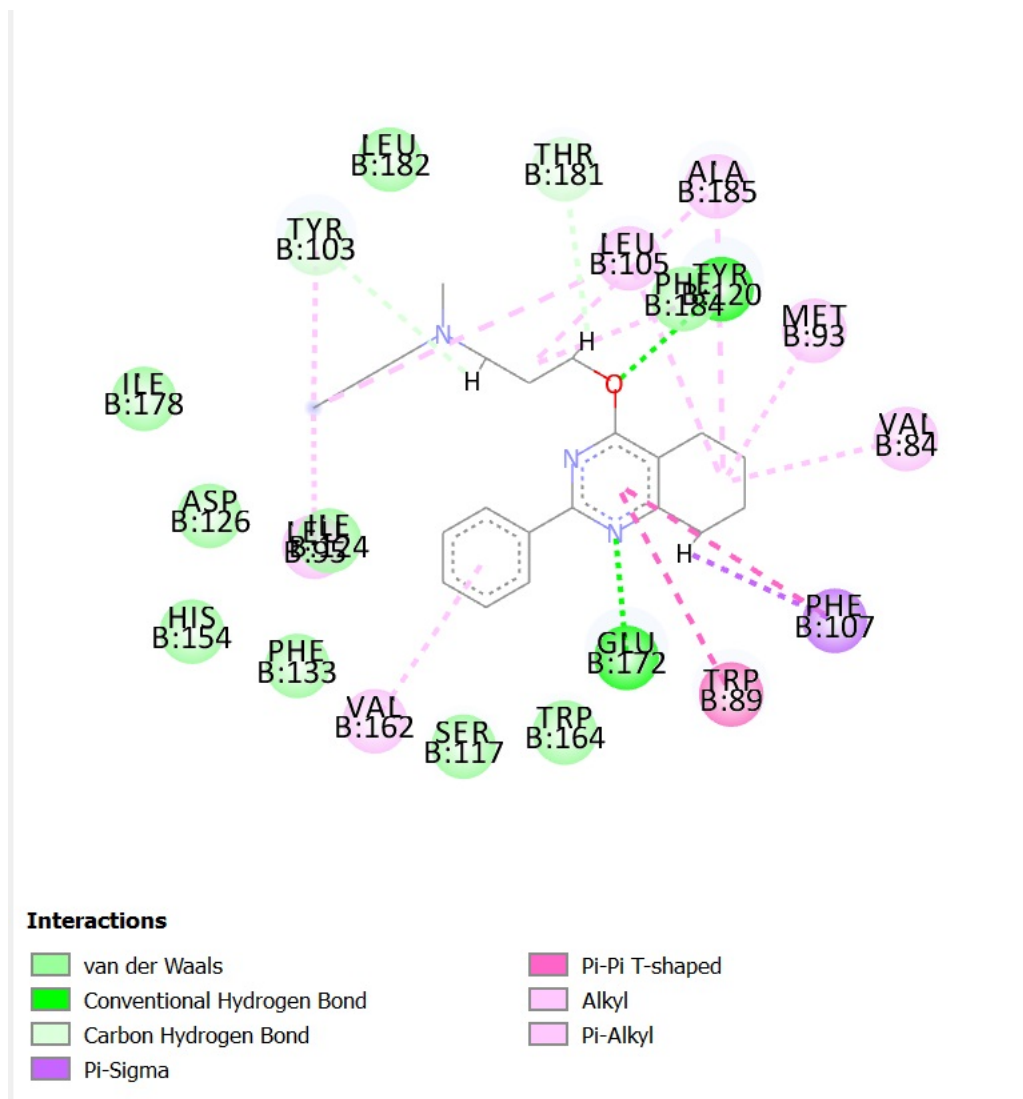

Figure S4. Two-dimensional representation of the interaction between molecule A3 and amino acids inside sigma 1 receptor binding pocket.

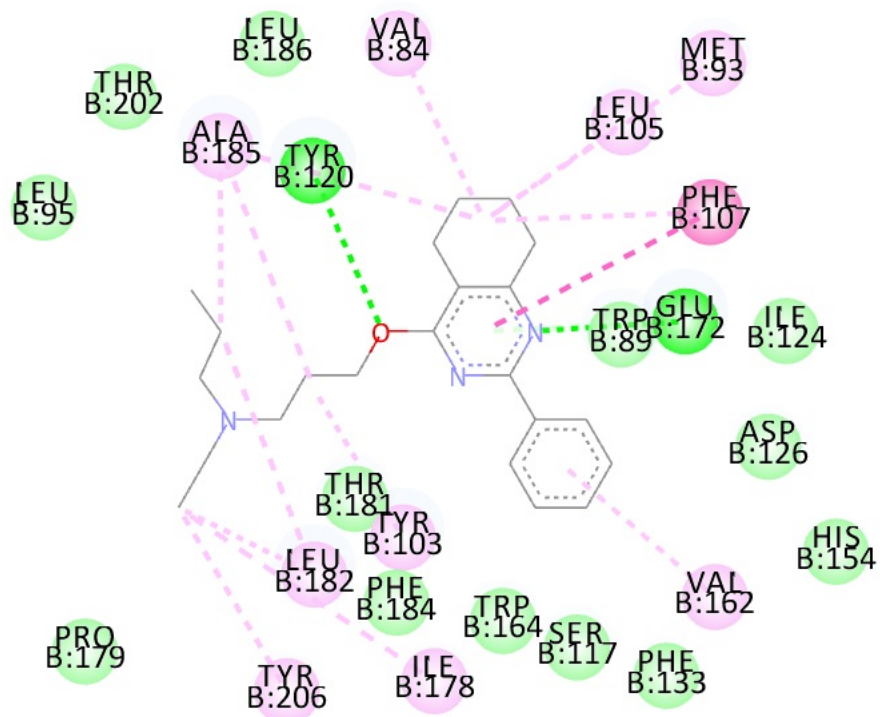

**Interactions**

- |                                                                 |                                                    |
|-----------------------------------------------------------------|----------------------------------------------------|
| <span style="color: green;">■</span> van der Waals              | <span style="color: pink;">■</span> Pi-Pi T-shaped |
| <span style="color: red;">■</span> Conventional Hydrogen Bond   | <span style="color: lightpurple;">■</span> Alkyl   |
| <span style="color: lightblue;">■</span> Pi-Donor Hydrogen Bond | <span style="color: lightblue;">■</span> Pi-Alkyl  |

Figure S5. Two-dimensional representation of the interaction between molecule A4 and amino acids inside sigma 1 receptor binding pocket.

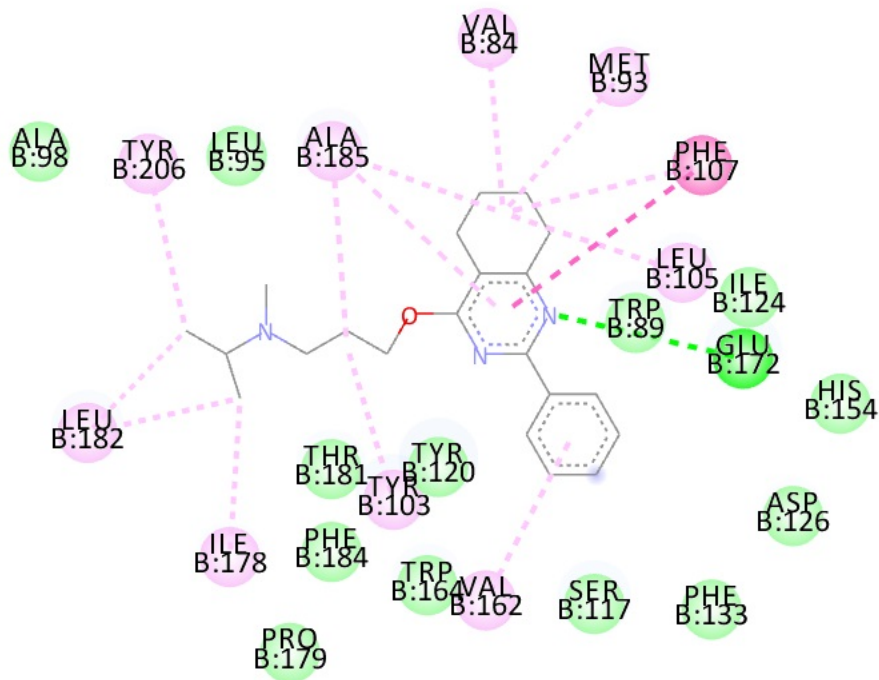

#### Interactions

- |                                                                 |                                                  |
|-----------------------------------------------------------------|--------------------------------------------------|
| <span style="color: lightgreen;">■</span> van der Waals         | <span style="color: lightpurple;">■</span> Alkyl |
| <span style="color: green;">■</span> Conventional Hydrogen Bond | <span style="color: pink;">■</span> Pi-Alkyl     |
| <span style="color: magenta;">■</span> Pi-Pi T-shaped           |                                                  |

Figure S6. Two-dimensional representation of the interaction between molecule A5 and amino acids inside sigma 1 receptor binding pocket.

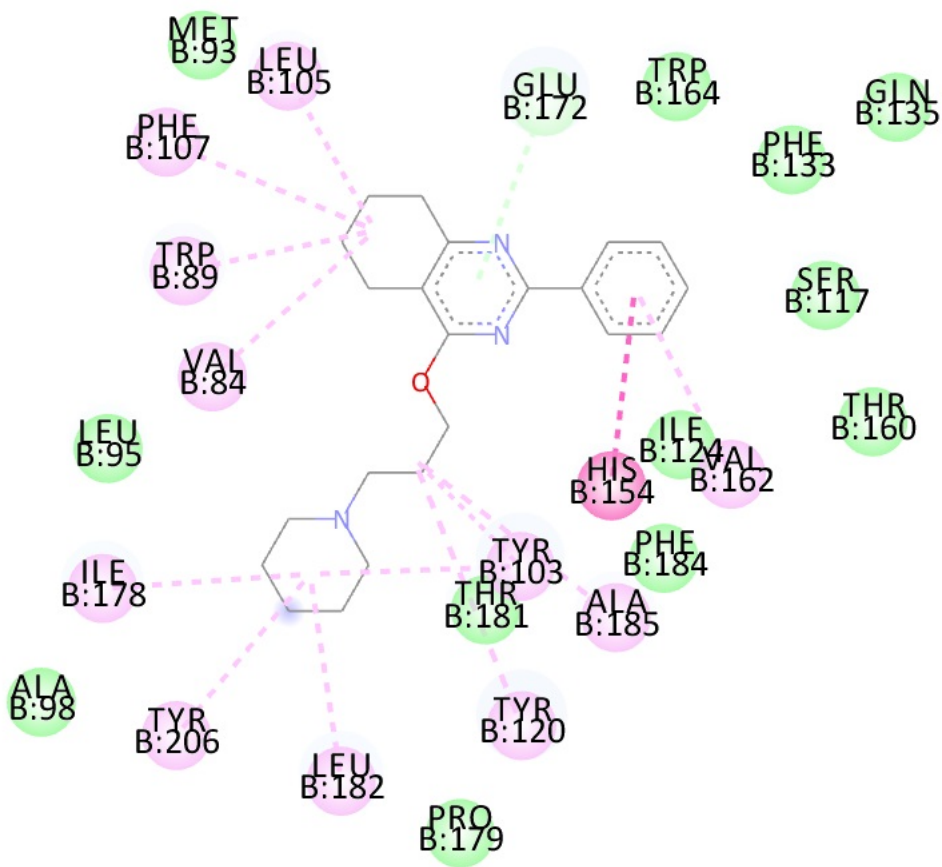

**Interactions**

- van der Waals
- Pi-Donor Hydrogen Bond
- Pi-Pi T-shaped
- Alkyl
- Pi-Alkyl

Figure S7. Two-dimensional representation of the interaction between molecule A6 and amino acids inside sigma 1 receptor binding pocket.

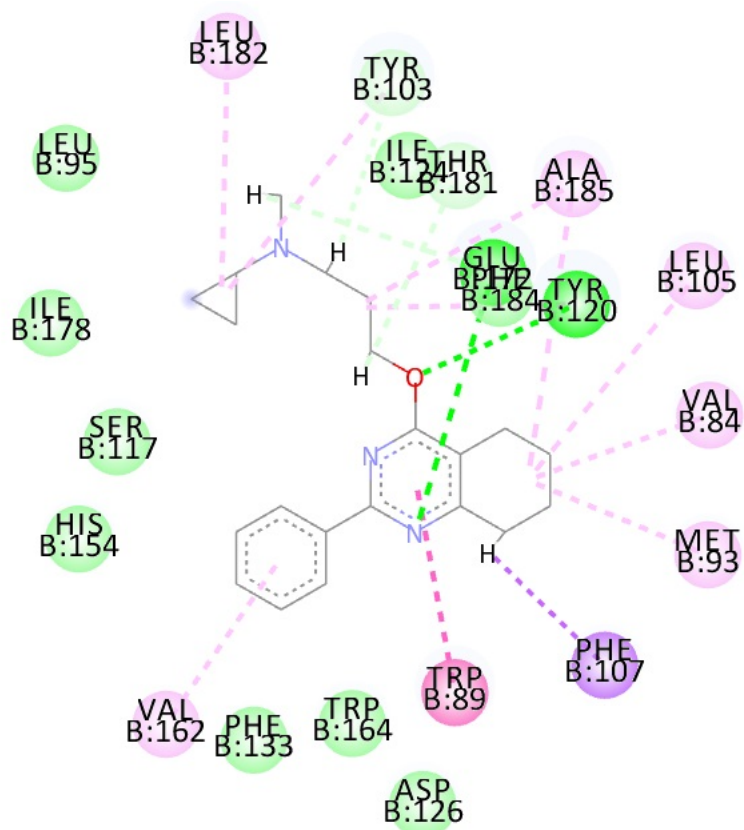

**Interactions**

- |                                                                |                                                     |
|----------------------------------------------------------------|-----------------------------------------------------|
| <span style="color: green;">■</span> van der Waals             | <span style="color: pink;">■</span> Pi-Pi T-shaped  |
| <span style="color: red;">■</span> Conventional Hydrogen Bond  | <span style="color: lightpink;">■</span> Alkyl      |
| <span style="color: lightgreen;">■</span> Carbon Hydrogen Bond | <span style="color: lightpurple;">■</span> Pi-Alkyl |
| <span style="color: purple;">■</span> Pi-Sigma                 |                                                     |

Figure S8. Two-dimensional representation of the interaction between molecule A7 and amino acids inside sigma 1 receptor binding pocket.

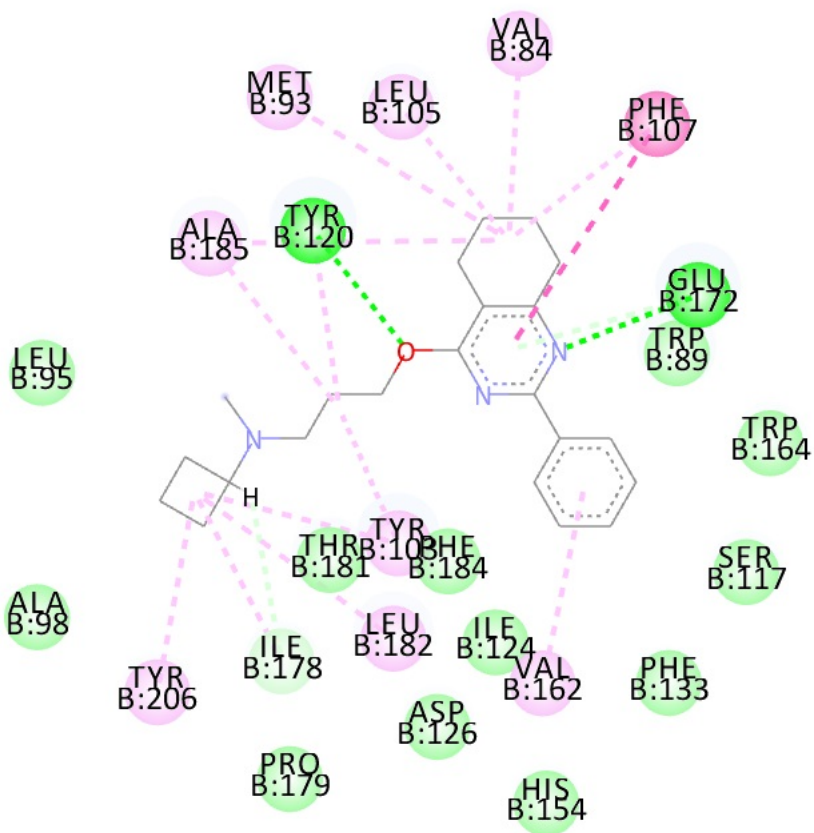

**Interactions**

- |                                                                                                                |                                                                                                    |
|----------------------------------------------------------------------------------------------------------------|----------------------------------------------------------------------------------------------------|
|  van der Waals              |  Pi-Pi T-shaped |
|  Conventional Hydrogen Bond |  Alkyl          |
|  Carbon Hydrogen Bond       |  Pi-Alkyl       |
|  Pi-Donor Hydrogen Bond     |                                                                                                    |

Figure S9. Two-dimensional representation of the interaction between molecule A8 and amino acids inside sigma 1 receptor binding pocket.

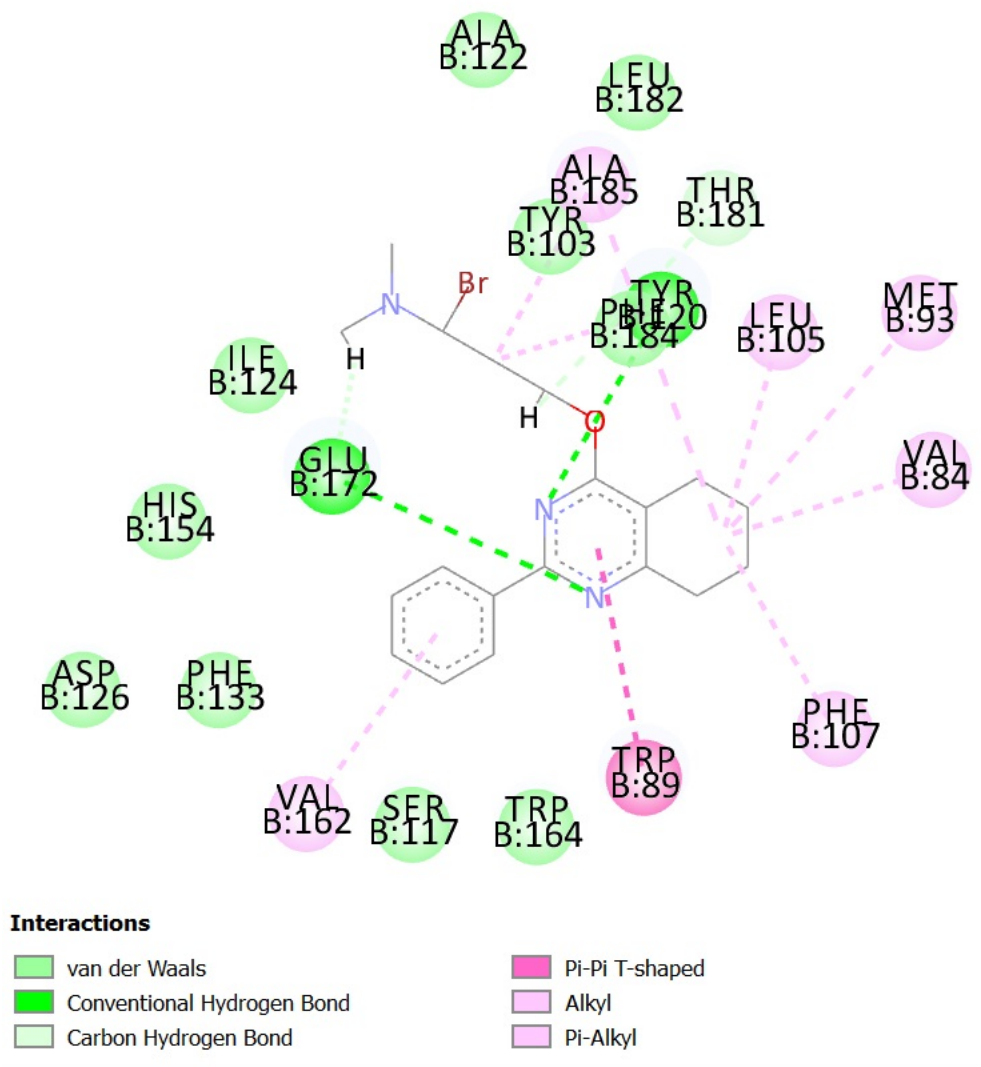

Figure S10. Two-dimensional representation of the interaction between molecule A9 and amino acids inside sigma 1 receptor binding pocket.

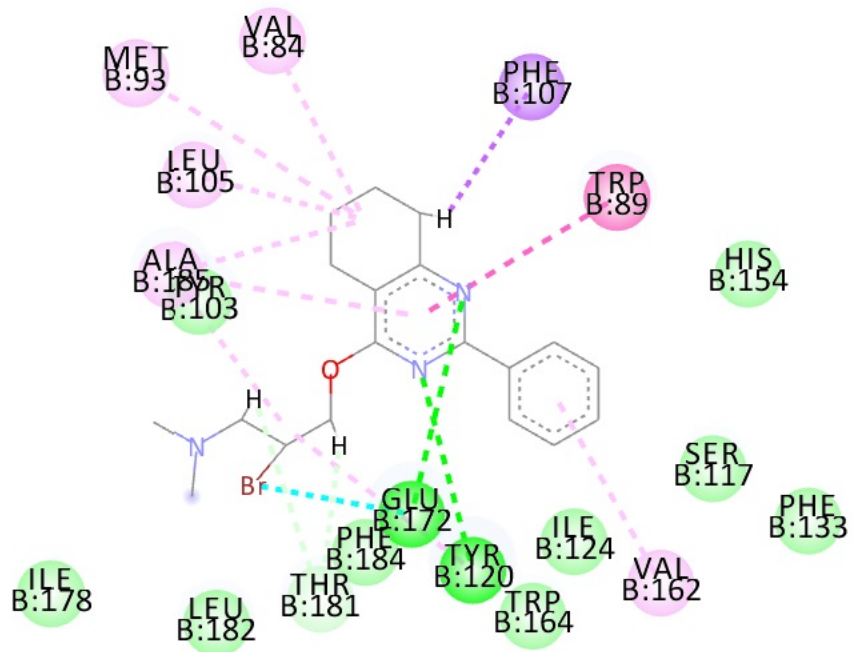

**Interactions**

- |                                                                |                                                       |
|----------------------------------------------------------------|-------------------------------------------------------|
| <span style="color: green;">■</span> van der Waals             | <span style="color: purple;">■</span> Pi-Sigma        |
| <span style="color: red;">■</span> Conventional Hydrogen Bond  | <span style="color: magenta;">■</span> Pi-Pi T-shaped |
| <span style="color: lightgreen;">■</span> Carbon Hydrogen Bond | <span style="color: pink;">■</span> Alkyl             |
| <span style="color: cyan;">■</span> Halogen (Cl, Br, I)        | <span style="color: lightpink;">■</span> Pi-Alkyl     |

Figure S11. Two-dimensional representation of the interaction between molecule A10 and amino acids inside sigma 1 receptor binding pocket.



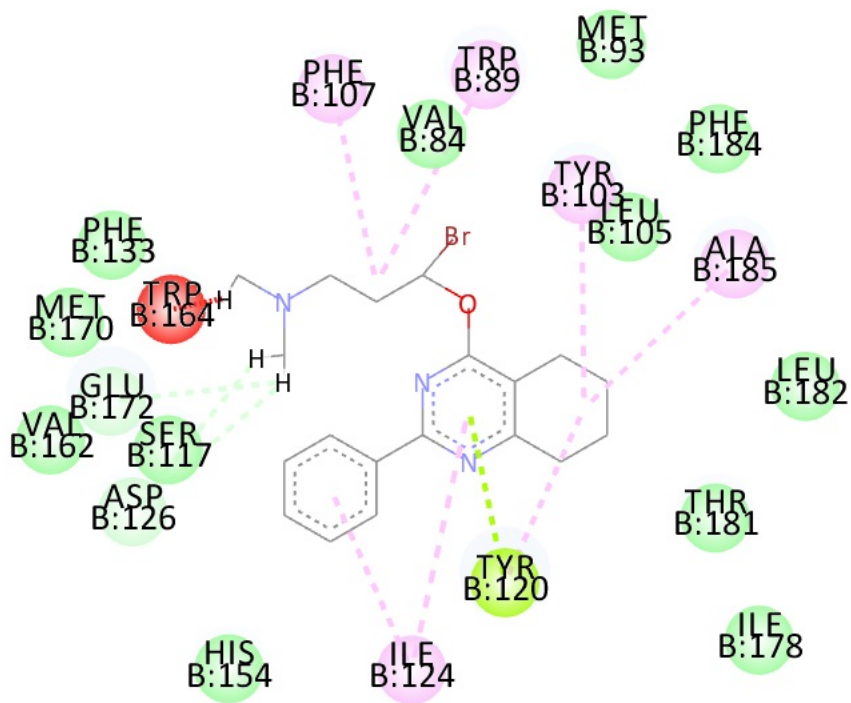

#### Interactions

- |                                                                |                                                     |
|----------------------------------------------------------------|-----------------------------------------------------|
| <span style="color: lightgreen;">■</span> van der Waals        | <span style="color: pink;">■</span> Pi-Pi Stacked   |
| <span style="color: red;">■</span> Unfavorable Bump            | <span style="color: lightpurple;">■</span> Alkyl    |
| <span style="color: lightgreen;">■</span> Carbon Hydrogen Bond | <span style="color: lightpurple;">■</span> Pi-Alkyl |
| <span style="color: yellowgreen;">■</span> Pi-Lone Pair        |                                                     |

Figure S12. Two-dimensional representation of the interaction between molecule A11 and amino acids inside sigma 1 receptor binding pocket.

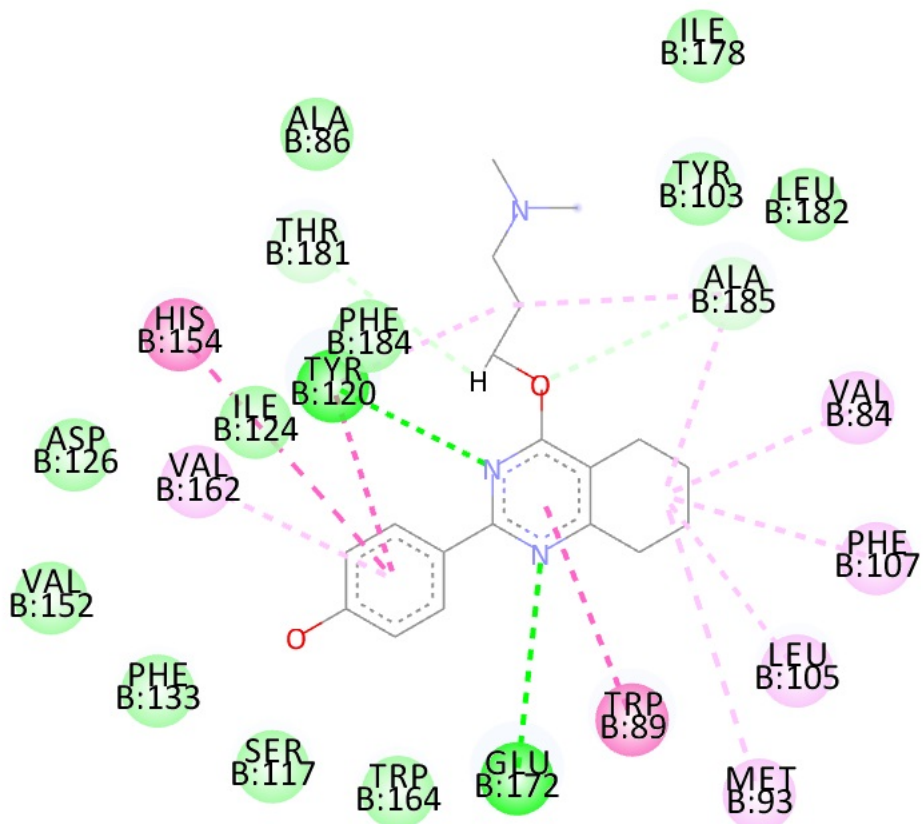

**Interactions**

- |                                                                |                                                       |
|----------------------------------------------------------------|-------------------------------------------------------|
| <span style="color: green;">■</span> van der Waals             | <span style="color: magenta;">■</span> Pi-Pi T-shaped |
| <span style="color: red;">■</span> Conventional Hydrogen Bond  | <span style="color: lightpink;">■</span> Alkyl        |
| <span style="color: lightgreen;">■</span> Carbon Hydrogen Bond | <span style="color: lightpurple;">■</span> Pi-Alkyl   |
| <span style="color: pink;">■</span> Pi-Pi Stacked              |                                                       |

Figure S13. Two-dimensional representation of the interaction between molecule A12 and amino acids inside sigma 1 receptor binding pocket.

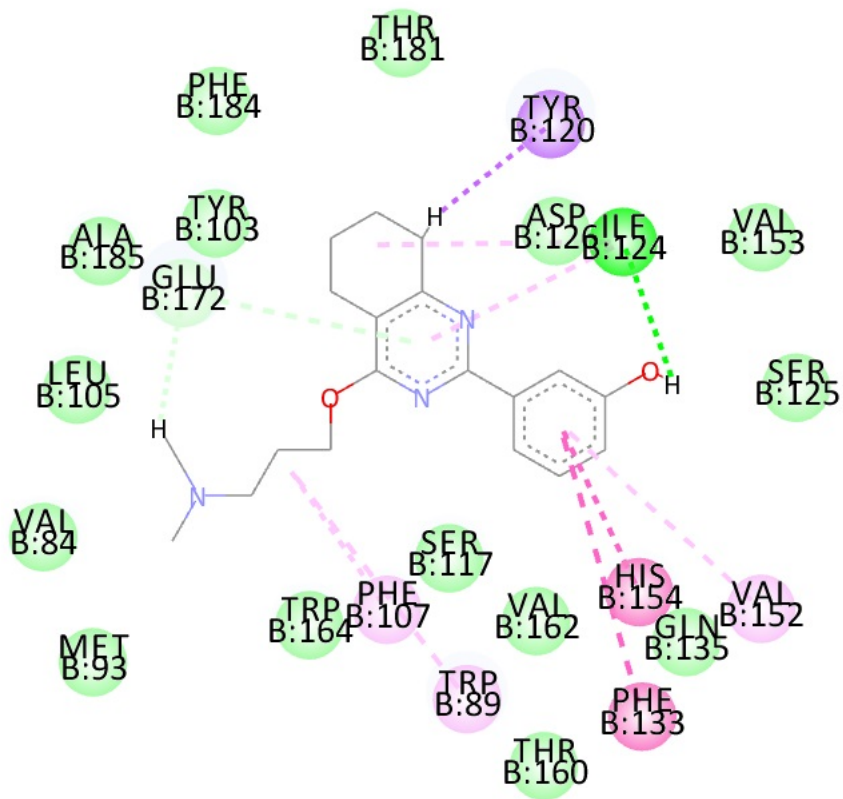

**Interactions**

- |                                                                   |                                                       |
|-------------------------------------------------------------------|-------------------------------------------------------|
| <span style="color: #90EE90;">■</span> van der Waals              | <span style="color: #FF69B4;">■</span> Pi-Pi Stacked  |
| <span style="color: #00FF00;">■</span> Conventional Hydrogen Bond | <span style="color: #FF69B4;">■</span> Pi-Pi T-shaped |
| <span style="color: #90EE90;">■</span> Carbon Hydrogen Bond       | <span style="color: #FF69B4;">■</span> Alkyl          |
| <span style="color: #90EE90;">■</span> Pi-Donor Hydrogen Bond     | <span style="color: #FF69B4;">■</span> Pi-Alkyl       |
| <span style="color: #8A2BE2;">■</span> Pi-Sigma                   |                                                       |

Figure S14. Two-dimensional representation of the interaction between molecule A13 and amino acids inside sigma 1 receptor binding pocket.

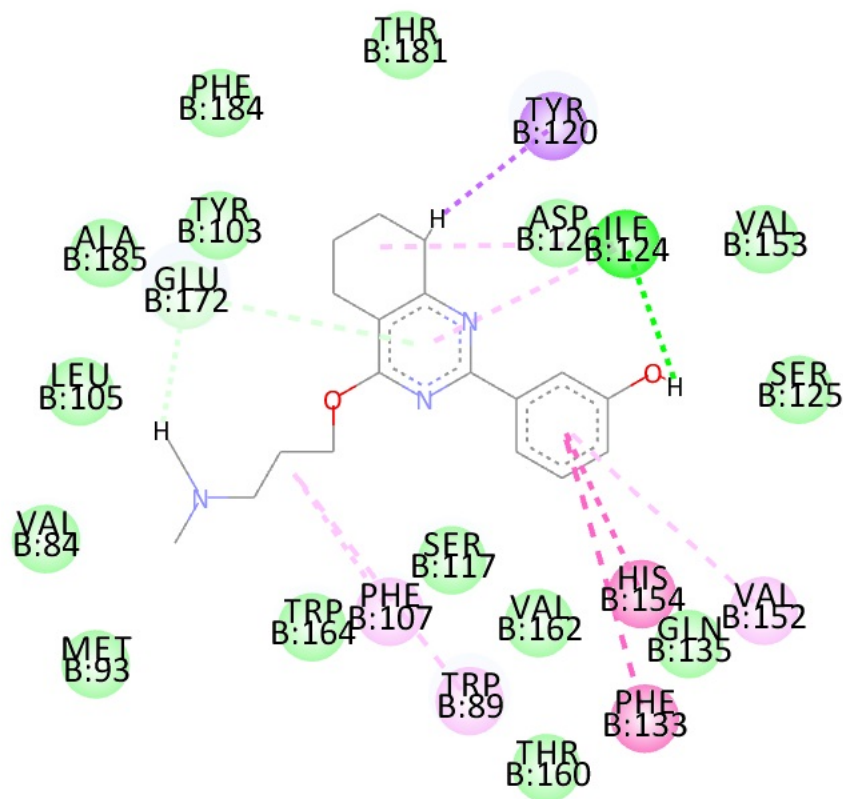

**Interactions**

- |                                                                  |                                                       |
|------------------------------------------------------------------|-------------------------------------------------------|
| <span style="color: lightgreen;">■</span> van der Waals          | <span style="color: magenta;">■</span> Pi-Pi Stacked  |
| <span style="color: red;">■</span> Conventional Hydrogen Bond    | <span style="color: magenta;">■</span> Pi-Pi T-shaped |
| <span style="color: lightgreen;">■</span> Carbon Hydrogen Bond   | <span style="color: pink;">■</span> Alkyl             |
| <span style="color: lightgreen;">■</span> Pi-Donor Hydrogen Bond | <span style="color: pink;">■</span> Pi-Alkyl          |
| <span style="color: purple;">■</span> Pi-Sigma                   |                                                       |

Figure S15. Two-dimensional representation of the interaction between molecule A14 and amino acids inside sigma 1 receptor binding pocket.
